# Supplementary material for: Unsaturation in binuclear heterometallic carbonyls: the cyclopentadienyliron manganese carbonyl CpFeMn(CO)nsystem as a hybrid of the Cp2Fe2(CO)nand Mn2(CO)nsystems
Source: Royal Society of Chemistry journal article supplement (doi:10.1039/c5nj03459k), 2016-01-01
Supplement: c5nj03459k1.pdf [file c5nj03459k1.pdf]

# Unsaturation In Binuclear Heterometallic Carbonyls: The Cyclopentadienyliron Manganese Carbonyl $\text{CpFeMn}(\text{CO})_n$ System as a Hybrid of the $\text{Cp}_2\text{Fe}_2(\text{CO})_n$ and $\text{Mn}_2(\text{CO})_n$ Systems

Xiuli Feng <sup>a</sup>, Nan Li <sup>\*a</sup>, Liqiang Lv <sup>b</sup> and R. Bruce King <sup>\*c</sup>

<sup>a</sup> State Key Laboratory of Explosion Science and Technology, School of Mechatronical Engineering, Beijing Institute of Technology, Beijing 100081, P. R. China

<sup>b</sup> College of Chemical Engineering, Shijiazhuang University, Shijiazhuang 050035, P. R. China

<sup>c</sup> Department of Chemistry and Center for Computational Chemistry, University of Georgia, Athens, Georgia 30606, USA

## Supporting Information

Tables **S1 to S13** Coordinates of  $\text{CpFeMn}(\text{CO})_n$  ( $n = 7, 6, 5$ ).

Table **S14** Harmonic vibrational frequencies of  $\text{CpFeMn}(\text{CO})_n$  ( $n = 7, 6, 5$ ).

Figure **S1 to S3** Optimized geometries (bond lengths in Å) at the BP86 level of theory for  $\text{CpFeMn}(\text{CO})_n$  ( $n = 7, 6, 5$ ).

Tables **S15 to S17** Total energies ( $E$ , in Hartree), relative energies ( $\Delta E$ , in  $\text{kcal}\cdot\text{mol}^{-1}$ ), Fe-Mn bond distances (Å), numbers of imaginary vibrational frequencies ( $N_{\text{imag}}$ ) and spin expectation values  $\langle S^2 \rangle$  for the  $\text{CpFeMn}(\text{CO})_n$  ( $n = 7, 6, 5$ ) structures.

**Figure S4** The structure of  $\text{CpFe}(\text{CO})_2\text{Mn}(\text{CO})_5$ .

**Table S18** Comparison of theoretical intramolecular distances (in Å) and angles (deg) of  $\text{CpFe}(\text{CO})_2\text{Mn}(\text{CO})_5$  with the experimental X-ray structural data.

**Figure S5** Optimized geometries (bond lengths in Å) for the experimentally known heterobimetallic compound  $\text{CpFeMn}(\text{CO})_7$  at the M06-L and BP86 level of theory using the empirical dispersion correction by Grimme's DFT-D3 method.

**Figure S6** Optimized geometries (bond lengths in Å) for the experimentally known heterobimetallic compound  $\text{CpFeMn}(\text{CO})_7$  using the DFT methods: (a) M06-L (up) and M06-L-D3 (below), (b) BP86 (up) and BP86-D3 (below).

**Figure S7** Bond paths for optimized  $\text{CpFeMn}(\text{CO})_n$  ( $n = 7, 6, 5$ ) structures at the M06-L level of theory. Red dots are bond critical points, yellow dots are ring critical points, and green dots are cage critical points.

**Figure S8** NCI isosurfaces of the 6CO-1S at the M06-L level of theory. The cutoff value is 0.09 au. The surfaces describe the reduced density gradient at an isovalue of 0.4 au. The surfaces are colored on a blue-green-red scale ranging from -0.04 to +0.02 au.

**Table S19** Topological data at the bond critical point for Mn- $\text{C}_{\text{cp}}$  segment in 6CO-1S at the M06-L level of theory. All values are in au.

**Table S20** Wiberg Bond Indices (WBI) of the Fe-Mn, Fe-Mn bond lengths and the

natural charges on the Fe and Mn atoms in the CpFeMn(CO)<sub>n</sub> (*n* = 7, 6, 5) structures from NBO analysis using the BP86 method.

**Table S21** The ADCH atomic charges on the Fe and Mn atoms in the CpFeMn(CO)<sub>n</sub> (*n* = 7, 6, 5) structures at the M06-L level of theory.

**Table S22** The CDA results of the CpFeMn(CO)<sub>n</sub> (*n* = 7, 6, 5) structures at the M06-L/DZP level of theory: calculated donation *d*(A→B), back-donation *b*(A←B), repulsive polarization *r*(A↔B), and the donation/back-donation (*d/b*) ratio.

**Table S23** The  $\nu(\text{CO})$  vibrational frequencies (cm<sup>-1</sup>) for the CpFeMn(CO)<sub>n</sub> (*n* = 7, 6, 5) structures by M06-L and BP86 methods (infrared intensities in parentheses are in kcal·mol<sup>-1</sup>).

**Table S24** Energies ( $\Delta E$ , in kcal·mol<sup>-1</sup>) for reactions of CpFeMn(CO)<sub>n</sub> using the BP86 method.

**Table S25** Energies ( $\Delta E$ , in kcal·mol<sup>-1</sup>) for reactions of CpFeMn(CO)<sub>n</sub> at the M06-L level of theory using the empirical dispersion correction by Grimme's DFT-D3 method.

**Table S26** Energies ( $\Delta E$ , in kcal·mol<sup>-1</sup>) for reactions of CpFeMn(CO)<sub>n</sub> at the BP86 level of theory using the empirical dispersion correction by Grimme's DFT-D3 method.

The description of the DZP basis set

Complete Gaussian reference.

Literature References

**Table S1** Theoretical Cartesian coordinates (in Å) of CpFeMn(CO)<sub>7</sub> **7CO-1S** using the M06-L and BP86 methods

| Atom | M06-L     |           |           | Atom | BP86      |           |           |
|------|-----------|-----------|-----------|------|-----------|-----------|-----------|
|      | X         | Y         | Z         |      | X         | Y         | Z         |
| C    | 0.981176  | -2.718360 | 1.144974  | C    | -3.067331 | -0.718099 | 1.032329  |
| C    | 1.802380  | -1.653099 | 0.713390  | C    | -2.057573 | -1.715412 | 0.824272  |
| C    | 1.802380  | -1.653099 | -0.713390 | C    | -1.841152 | -1.826987 | -0.585280 |
| C    | 0.981176  | -2.718360 | -1.144974 | C    | -2.688008 | -0.893579 | -1.242318 |
| C    | 0.448973  | -3.372807 | 0.000000  | C    | -3.453630 | -0.201010 | -0.237781 |
| H    | 0.759627  | -2.963427 | 2.173272  | H    | -3.456582 | -0.397047 | 1.995401  |
| H    | 2.343711  | -0.974370 | 1.353861  | H    | -1.564182 | -2.297723 | 1.596987  |
| H    | 2.343711  | -0.974370 | -1.353861 | H    | -1.151757 | -2.509218 | -1.073341 |
| H    | 0.759627  | -2.963427 | -2.173272 | H    | -2.742955 | -0.729046 | -2.315326 |
| H    | -0.215452 | -4.222688 | 0.000000  | H    | -4.196698 | 0.571318  | -0.417944 |
| Fe   | -0.153634 | -1.395415 | 0.000000  | Fe   | -1.416201 | 0.177196  | 0.084362  |
| Mn   | 0.097206  | 1.436474  | 0.000000  | Mn   | 1.422988  | -0.132435 | -0.072626 |
| C    | 1.917980  | 1.302715  | 0.000000  | C    | 1.131561  | -1.899944 | 0.285198  |
| C    | -1.753362 | 1.414258  | 0.000000  | C    | 1.623196  | 1.684489  | -0.309982 |
| C    | 0.156891  | 3.228968  | 0.000000  | C    | 3.124499  | -0.438723 | -0.536020 |
| C    | 0.155277  | 1.105312  | -1.809082 | C    | 0.725603  | -0.321520 | -1.760579 |
| C    | 0.155277  | 1.105312  | 1.809082  | C    | 1.735653  | 0.095040  | 1.727070  |
| O    | 3.064586  | 1.244867  | 0.000000  | O    | 1.017174  | -3.026164 | 0.528211  |
| O    | 0.196597  | 4.376695  | 0.000000  | O    | 4.219812  | -0.645115 | -0.852360 |
| O    | -2.897102 | 1.416522  | 0.000000  | O    | 1.808830  | 2.814490  | -0.446252 |
| O    | 0.248662  | 0.890807  | -2.932216 | O    | 0.387534  | -0.471604 | -2.858981 |
| O    | 0.248662  | 0.890807  | 2.932216  | O    | 1.977753  | 0.209501  | 2.849885  |
| O    | -2.171730 | -1.212055 | -2.085114 | O    | -1.412039 | 2.566980  | -1.579327 |
| O    | -2.171730 | -1.212055 | 2.085114  | O    | -0.860523 | 1.715133  | 2.489461  |
| C    | -1.371613 | -1.245211 | 1.259825  | C    | -1.004394 | 1.084325  | 1.523603  |
| C    | -1.371613 | -1.245211 | -1.259825 | C    | -1.353361 | 1.611376  | -0.921953 |

**Table S2** Theoretical Cartesian coordinates (in Å) of CpFeMn(CO)<sub>7</sub> **7CO-2S** using the M06-L and BP86 methods

| Atom | M06-L     |           |           | Atom | BP86      |           |           |
|------|-----------|-----------|-----------|------|-----------|-----------|-----------|
|      | X         | Y         | Z         |      | X         | Y         | Z         |
| C    | 1.686061  | -2.078161 | 0.709969  | C    | -1.720319 | 2.140479  | 0.716991  |
| C    | 1.686061  | -2.078161 | -0.709969 | C    | -1.720319 | 2.140479  | -0.716991 |
| C    | 0.618423  | -2.891475 | -1.154079 | C    | -0.637215 | 2.945927  | -1.163617 |
| C    | -0.048530 | -3.382425 | 0.000000  | C    | 0.046479  | 3.428010  | 0.000000  |
| C    | 0.618423  | -2.891475 | 1.154079  | C    | -0.637215 | 2.945927  | 1.163617  |
| H    | 2.367035  | -1.526943 | 1.341625  | H    | -2.422479 | 1.606536  | 1.352291  |
| H    | 2.367035  | -1.526943 | -1.341625 | H    | -2.422479 | 1.606536  | -1.352291 |
| H    | 0.334305  | -3.067178 | -2.180077 | H    | -0.353046 | 3.127938  | -2.196322 |
| H    | -0.920347 | -4.020097 | 0.000000  | H    | 0.922186  | 4.073090  | 0.000000  |
| H    | 0.334305  | -3.067178 | 2.180077  | H    | -0.353046 | 3.127938  | 2.196322  |
| F    | -0.162407 | -1.315479 | 0.000000  | Fe   | 0.162321  | 1.328670  | 0.000000  |
| M    | 0.100784  | 1.309776  | 0.000000  | Mn   | -0.096518 | -1.313619 | 0.000000  |
| C    | -0.206263 | -0.113608 | -1.482225 | C    | 0.222575  | 0.123320  | -1.470941 |
| C    | 0.300920  | 2.488827  | 1.362655  | C    | -0.293692 | -2.500876 | 1.355591  |
| C    | 0.300920  | 2.488827  | -1.362655 | C    | -0.293692 | -2.500876 | -1.355591 |
| C    | -1.724162 | 1.632691  | 0.000000  | C    | 1.714498  | -1.679803 | 0.000000  |
| C    | 1.914530  | 1.014674  | 0.000000  | C    | -1.914965 | -1.080496 | 0.000000  |
| C    | -0.206263 | -0.113608 | 1.482225  | C    | 0.222575  | 0.123320  | 1.470941  |
| C    | -1.918397 | -1.418113 | 0.000000  | C    | 1.909966  | 1.468007  | 0.000000  |
| O    | -0.305941 | -0.161035 | -2.646938 | O    | 0.348656  | 0.161391  | -2.643741 |
| O    | 0.424479  | 3.225754  | -2.231054 | O    | -0.417866 | -3.260781 | -2.217320 |
| O    | 0.424479  | 3.225754  | 2.231054  | O    | -0.417866 | -3.260781 | 2.217320  |
| O    | -2.841467 | 1.871932  | 0.000000  | O    | 2.826781  | -1.983399 | 0.000000  |
| O    | 3.052073  | 0.869813  | 0.000000  | O    | -3.069603 | -1.005480 | 0.000000  |
| O    | -3.061393 | -1.531381 | 0.000000  | O    | 3.059920  | 1.616722  | 0.000000  |
| O    | -0.305941 | -0.161035 | 2.646938  | O    | 0.348656  | 0.161391  | 2.643741  |

**Table S3** Theoretical Cartesian coordinates (in Å) of CpFeMn(CO)<sub>7</sub> **7CO-3S** using the M06-L and BP86 methods

| Atom | M06-L     |           |           | Atom | BP86      |           |           |
|------|-----------|-----------|-----------|------|-----------|-----------|-----------|
|      | X         | Y         | Z         |      | X         | Y         | Z         |
| C    | 2.804767  | 0.005802  | -1.771553 | C    | -2.840436 | 0.509224  | 1.730242  |
| C    | 1.458994  | -0.442488 | -1.903906 | C    | -1.509936 | 0.047393  | 1.999417  |
| C    | 1.314153  | -1.598739 | -1.102366 | C    | -1.407615 | -1.286672 | 1.510970  |
| C    | 2.545040  | -1.843753 | -0.455542 | C    | -2.662988 | -1.641679 | 0.931712  |
| C    | 3.480345  | -0.854245 | -0.881266 | C    | -3.561431 | -0.534782 | 1.080570  |
| H    | 3.226800  | 0.877612  | -2.249641 | H    | -3.231003 | 1.493928  | 1.976864  |
| H    | 0.687256  | 0.017768  | -2.502599 | H    | -0.719632 | 0.617151  | 2.479711  |
| H    | 0.398843  | -2.151877 | -0.954270 | H    | -0.517515 | -1.908450 | 1.535364  |
| H    | 2.743310  | -2.643028 | 0.242900  | H    | -2.898438 | -2.594320 | 0.462948  |
| H    | 4.506248  | -0.765154 | -0.559597 | H    | -4.590388 | -0.489169 | 0.734882  |
| Fe   | 1.839830  | 0.060766  | 0.102461  | Fe   | -1.856964 | 0.043095  | -0.115086 |
| Mn   | -1.895036 | 0.051610  | 0.156593  | Mn   | 1.906052  | 0.038442  | -0.137573 |
| C    | -2.248400 | -0.752421 | -1.389549 | C    | 2.349009  | -0.512661 | 1.496317  |
| C    | -0.000350 | 0.249134  | 0.639647  | C    | -0.008400 | 0.189611  | -0.611200 |
| C    | -3.596858 | 0.435765  | 0.723056  | C    | 3.572884  | 0.293165  | -0.843661 |
| C    | -1.862189 | -1.642824 | 0.876388  | C    | 1.859401  | -1.743849 | -0.576097 |
| C    | -1.697616 | 1.582275  | -0.845696 | C    | 1.829559  | 1.716662  | 0.603160  |
| C    | 1.940850  | 1.821591  | 0.172260  | C    | -2.123319 | 1.677127  | -0.710419 |
| C    | 2.325113  | -0.127785 | 1.787634  | C    | -2.221846 | -0.675490 | -1.678774 |
| O    | -2.442595 | -1.279269 | -2.399920 | O    | 2.634090  | -0.874438 | 2.567170  |
| O    | -4.657878 | 0.680603  | 1.082153  | O    | 4.619791  | 0.460284  | -1.306563 |
| O    | -0.531654 | 0.759318  | 1.607163  | O    | 0.524325  | 0.542826  | -1.658255 |
| O    | -1.835239 | -2.736646 | 1.222795  | O    | 1.850424  | -2.887151 | -0.758860 |
| O    | -1.540295 | 2.470287  | -1.555435 | O    | 1.800219  | 2.732743  | 1.157237  |
| O    | 2.651925  | -0.258517 | 2.877336  | O    | -2.487057 | -1.151109 | -2.698605 |
| O    | 2.005083  | 2.964307  | 0.209628  | O    | -2.324610 | 2.748226  | -1.096078 |

**Table S4** Theoretical Cartesian coordinates (in Å) of CpFeMn(CO)<sub>7</sub> **7CO-4S** using the M06-L and BP86 methods

| Atom | M06-L     |           |           | Atom | BP86      |           |           |
|------|-----------|-----------|-----------|------|-----------|-----------|-----------|
|      | X         | Y         | Z         |      | X         | Y         | Z         |
| C    | -3.520094 | -0.900216 | 0.767563  | C    | -3.624524 | -0.850926 | 0.710755  |
| C    | -2.390085 | -1.772519 | 0.666594  | C    | -2.508224 | -1.763591 | 0.698349  |
| C    | -2.003416 | -1.824375 | -0.690389 | C    | -2.044720 | -1.871869 | -0.643634 |
| C    | -2.847333 | -0.959426 | -1.428166 | C    | -2.834860 | -1.008523 | -1.461438 |
| C    | -3.801218 | -0.406791 | -0.519315 | C    | -3.823545 | -0.391206 | -0.616368 |
| H    | -4.047410 | -0.650050 | 1.675506  | H    | -4.200212 | -0.558680 | 1.585123  |
| H    | -1.920866 | -2.306040 | 1.479392  | H    | -2.100737 | -2.288877 | 1.558079  |
| H    | -1.168762 | -2.381517 | -1.088531 | H    | -1.210492 | -2.480692 | -0.981307 |
| H    | -2.788089 | -0.768245 | -2.488517 | H    | -2.721725 | -0.861117 | -2.531902 |
| H    | -4.580815 | 0.295881  | -0.772563 | H    | -4.579292 | 0.321334  | -0.937767 |
| Fe   | -1.847676 | 0.152380  | 0.032695  | Fe   | -1.856885 | 0.153521  | 0.027311  |
| Mn   | 1.898710  | -0.102972 | -0.219221 | Mn   | 1.910133  | -0.099277 | -0.201202 |
| C    | 1.643988  | -1.893406 | 0.091978  | C    | 1.719550  | -1.890205 | 0.127187  |
| C    | 1.924398  | 1.740581  | -0.163704 | C    | 2.014096  | 1.737766  | -0.188776 |
| C    | 3.529391  | -0.285311 | -1.040896 | C    | 3.519989  | -0.299889 | -1.047995 |
| C    | -1.309405 | 0.769698  | 1.607486  | C    | -1.391082 | 0.768618  | 1.616461  |
| C    | -1.936873 | 1.760133  | -0.693433 | C    | -1.952676 | 1.757364  | -0.695264 |
| O    | 1.466811  | -2.990377 | 0.385716  | O    | 1.621567  | -3.006564 | 0.424638  |
| O    | 4.5399651 | -0.401708 | -1.570265 | O    | 4.524847  | -0.430762 | -1.606523 |
| O    | 922109    | 2.878811  | -0.026047 | O    | 2.112218  | 2.885757  | -0.090251 |
| O    | -2.004116 | 2.797619  | -1.175364 | O    | -2.047924 | 2.807011  | -1.171980 |
| O    | -0.963263 | 1.157764  | 2.627001  | O    | -1.124741 | 1.165147  | 2.668889  |
| O    | 0.402170  | -0.086871 | -1.722874 | O    | 0.396585  | -0.101487 | -1.703666 |
| C    | -0.014817 | 0.029467  | -0.585809 | C    | -0.015288 | 0.026771  | -0.554812 |
| O    | 2.748124  | 0.023116  | 2.588639  | O    | 2.803210  | 0.063428  | 2.602259  |
| C    | 2.422692  | -0.025240 | 1.483215  | C    | 2.449960  | 0.002051  | 1.495671  |

**Table S5** Theoretical Cartesian coordinates (in Å) of CpFeMn(CO)<sub>6</sub> **6CO-1S** using the M06-L and BP86 methods

| Atom | M06-L    |           |           | Atom | BP86      |           |           |
|------|----------|-----------|-----------|------|-----------|-----------|-----------|
|      | X        | Y         | Z         |      | X         | Y         | Z         |
| C    | 1.430889 | -2.655147 | 0.705359  | C    | -2.602134 | -0.711426 | -1.565351 |
| C    | 1.659694 | -1.326747 | 1.153612  | C    | -1.251126 | -1.163162 | -1.700966 |
| C    | 1.751439 | -0.484610 | 0.000000  | C    | -0.395048 | -0.000005 | -1.717984 |
| C    | 1.659694 | -1.326747 | -1.153612 | C    | -1.251130 | 1.163148  | -1.700973 |
| C    | 1.430889 | -2.655147 | -0.705359 | C    | -2.602136 | 0.711409  | -1.565355 |
| H    | 1.268414 | -3.512935 | 1.339731  | H    | -3.476556 | -1.349525 | -1.468472 |
| H    | 1.706947 | -1.000005 | 2.180719  | H    | -0.923219 | -2.197721 | -1.737923 |
| H    | 2.094320 | 0.585944  | 0.000000  | H    | 0.704348  | -0.000004 | -2.027989 |
| H    | 1.706947 | -1.000005 | -2.180719 | H    | -0.923227 | 2.197707  | -1.737935 |
| H    | 1.268414 | -3.512935 | -1.339731 | H    | -3.476560 | 1.349505  | -1.468479 |
| Fe   | 0.050641 | -1.339417 | 0.000000  | Fe   | -1.374176 | -0.000002 | 0.038117  |
| Mn   | 0.281644 | 1.251102  | 0.000000  | Mn   | 1.269528  | 0.000001  | -0.231874 |
| C    | 1.478705 | 1.523010  | 0.000000  | C    | 1.578009  | 0.000008  | 1.523529  |
| C    | 0.802461 | 2.968851  | 0.000000  | C    | 2.984163  | 0.000002  | -0.762385 |
| C    | 0.172271 | 1.154559  | -1.836834 | C    | 1.231659  | 1.833058  | -0.120827 |
| C    | 0.172271 | 1.154559  | 1.836834  | C    | 1.231663  | -1.833054 | -0.120816 |
| O    | 1.113558 | 4.076065  | 0.000000  | O    | 4.095780  | 0.000001  | -1.094851 |
| O    | 2.619940 | 1.655952  | 0.000000  | O    | 1.770856  | 0.000012  | 2.665744  |
| O    | 0.035375 | 1.125470  | -2.973985 | O    | 1.278424  | 2.980506  | 0.011381  |
| O    | 0.035375 | 1.125470  | 2.973985  | O    | 1.278457  | -2.980502 | 0.011396  |
| O    | 2.044037 | -1.532052 | -2.112354 | O    | -1.832021 | 2.104591  | 2.005583  |
| O    | 2.044037 | -1.532052 | 2.112354  | O    | -1.832023 | -2.104585 | 2.005595  |
| C    | 1.265435 | -1.456592 | 1.267936  | C    | -1.627809 | -1.261527 | 1.232888  |
| C    | 1.265435 | -1.456592 | -1.267936 | C    | -1.627812 | 1.261528  | 1.232881  |

**Table S6** Theoretical Cartesian coordinates (in Å) of CpFeMn(CO)<sub>6</sub> **6CO-2T** using the M06-L and BP86 methods

| Atom | M06-L     |          |          | Atom | BP86      |           |           |
|------|-----------|----------|----------|------|-----------|-----------|-----------|
|      | X         | Y        | Z        |      | X         | Y         | Z         |
| C    | 0.982155  | 2.885639 | 0.710344 | C    | -2.917407 | 1.010164  | 0.685491  |
| C    | -0.362816 | 2.903078 | 1.146267 | C    | -2.926618 | -0.331570 | 1.166891  |
| C    | -1.198543 | 2.903629 | 0.000000 | C    | -2.931684 | -1.210509 | 0.039260  |
| C    | -0.362816 | 2.903078 | 1.146267 | C    | -2.929245 | -0.404414 | -1.141525 |
| C    | 0.982155  | 2.885639 | 0.710344 | C    | -2.919064 | 0.965087  | -0.745726 |
| H    | 1.857366  | 2.850371 | 1.341895 | H    | -2.890941 | 1.909784  | 1.295194  |
| H    | -0.698236 | 2.878125 | 2.172255 | H    | -2.903779 | -0.635891 | 2.210223  |
| H    | -2.278287 | 2.898711 | 0.000000 | H    | -2.925933 | -2.297043 | 0.073595  |
| H    | -0.698236 | 2.878125 | 2.172255 | H    | -2.908917 | -0.773583 | -2.163770 |
| H    | 1.857366  | 2.850371 | 1.341895 | H    | -2.894363 | 1.824446  | -1.411044 |
| Fe   | -0.010440 | 1.137582 | 0.000000 | Fe   | -1.141280 | -0.007066 | -0.001113 |
| Mn   | 0.009746  | 1.170759 | 0.000000 | Mn   | 1.178344  | 0.006150  | 0.000863  |
| C    | -0.818964 | 0.056096 | 1.382119 | C    | -0.063166 | -0.776103 | 1.401427  |
| C    | 0.778194  | 2.159045 | 1.331665 | C    | 2.176045  | 0.733094  | -1.341467 |
| C    | -1.516787 | 2.177654 | 0.000000 | C    | 2.190085  | -1.510909 | 0.040712  |
| C    | -0.818964 | 0.056096 | 1.382119 | C    | -0.067720 | -0.847960 | -1.359718 |
| C    | 0.778194  | 2.159045 | 1.331665 | C    | 2.175105  | 0.806027  | 1.301123  |
| O    | -1.420932 | 0.117324 | 2.376319 | O    | -0.123245 | -1.351286 | 2.423411  |
| O    | -2.475932 | 2.802483 | 0.000000 | O    | 2.832800  | -2.470656 | 0.066119  |
| O    | 1.260892  | 2.770976 | 2.170319 | O    | 2.808991  | 1.192789  | -2.191861 |
| O    | -1.420932 | 0.117324 | 2.376319 | O    | -0.121741 | -1.475312 | -2.350894 |
| O    | 1.260892  | 2.770976 | 2.170319 | O    | 2.806766  | 1.312722  | 2.125429  |
| O    | 2.761545  | 0.159950 | 0.000000 | O    | -0.150410 | 2.768869  | -0.074432 |
| C    | 1.602119  | 0.058297 | 0.000000 | C    | -0.067443 | 1.597969  | -0.042971 |



**Table S7** Theoretical Cartesian coordinates (in Å) of CpFeMn(CO)<sub>6</sub> **6CO-3S** using the M06-L and BP86 methods

| Atom | M06-L    |           |           | Atom | BP86      |           |           |
|------|----------|-----------|-----------|------|-----------|-----------|-----------|
|      | X        | Y         | Z         |      | X         | Y         | Z         |
| C    | 3.085339 | -0.723022 | -0.872305 | C    | 3.091930  | -0.745304 | -0.934925 |
| C    | 2.163267 | -1.707035 | -0.405783 | C    | 2.200126  | -1.742650 | -0.410931 |
| C    | 1.859303 | -1.418904 | 0.948249  | C    | 1.976539  | -1.458754 | 0.972407  |
| C    | 2.570761 | -0.257181 | 1.323521  | C    | 2.714027  | -0.289718 | 1.310985  |
| C    | 3.343207 | 0.163663  | 0.195098  | C    | 3.413387  | 0.147445  | 0.126845  |
| H    | 3.502611 | -0.660420 | -1.865319 | H    | 3.454208  | -0.680733 | -1.957155 |
| H    | 1.758875 | -2.523104 | -0.985044 | H    | 1.769679  | -2.569595 | -0.969323 |
| H    | 1.179028 | -1.971558 | 1.578986  | H    | 1.341694  | -2.026580 | 1.647472  |
| H    | 2.532712 | 0.226132  | 2.287808  | H    | 2.745340  | 0.187913  | 2.286400  |
| H    | 3.985805 | 1.030457  | 0.158044  | H    | 4.062773  | 1.016388  | 0.055778  |
| Fe   | 1.335695 | 0.190894  | -0.284263 | Fe   | 1.354183  | 0.185977  | -0.241874 |
| Mn   | 1.361342 | -0.115929 | -0.138145 | Mn   | -1.379634 | -0.103645 | -0.140351 |
| C    | 1.030394 | -1.924100 | -0.118025 | C    | -1.115980 | -1.916354 | -0.111466 |
| C    | 1.711725 | 1.705779  | -0.054684 | C    | -1.740380 | 1.707470  | -0.035448 |
| C    | 3.134661 | -0.437019 | -0.101002 | C    | -3.158252 | -0.399245 | -0.171707 |
| C    | 0.982010 | -0.079984 | 1.596942  | C    | -1.069086 | -0.087277 | 1.605574  |
| O    | 0.857603 | -3.054553 | -0.035854 | O    | -1.009903 | -3.065163 | -0.023701 |
| O    | 4.261199 | -0.652116 | -0.040337 | O    | -4.299324 | -0.599241 | -0.157446 |
| O    | 1.988377 | 2.807873  | 0.064775  | O    | -2.048771 | 2.810374  | 0.099569  |
| O    | 0.739361 | -0.064101 | 2.724190  | O    | -0.904733 | -0.084248 | 2.756739  |
| O    | 1.221656 | 3.067710  | 0.137816  | O    | 1.342806  | 3.076801  | 0.139436  |
| O    | 0.758691 | 0.069208  | -2.308990 | O    | -0.695343 | 0.107589  | -2.331155 |
| C    | 0.181609 | 0.155184  | -1.591504 | C    | 0.196066  | 0.169427  | -1.537344 |
| C    | 1.224481 | 1.929500  | -0.030973 | C    | 1.296715  | 1.924864  | -0.002860 |

**Table S8** Theoretical Cartesian coordinates (in Å) of CpFeMn(CO)<sub>6</sub> **6CO-4S** using the M06-L and BP86 methods

| Atom | M06-L     |           |           | Atom | BP86      |           |           |
|------|-----------|-----------|-----------|------|-----------|-----------|-----------|
|      | X         | Y         | Z         |      | X         | Y         | Z         |
| C    | 1.370480  | 2.446873  | 0.705415  | C    | 1.381934  | 2.527248  | 0.709492  |
| C    | 0.112186  | 2.946892  | 1.139618  | C    | 0.092869  | 2.980982  | 1.148532  |
| C    | -0.666316 | 3.273577  | 0.000000  | C    | -0.700191 | 3.287095  | 0.000000  |
| C    | 0.112186  | 2.946892  | -1.139618 | C    | 0.092869  | 2.980982  | -1.148532 |
| C    | 1.370480  | 2.446873  | -0.705415 | C    | 1.381934  | 2.527248  | -0.709492 |
| H    | 2.174935  | 2.110928  | 1.341274  | H    | 2.204261  | 2.222930  | 1.350711  |
| H    | -0.204333 | 3.046101  | 2.167470  | H    | -0.225139 | 3.079970  | 2.183762  |
| H    | -1.666911 | 3.676382  | 0.000000  | H    | -1.721357 | 3.657491  | 0.000000  |
| H    | -0.204333 | 3.046101  | -2.167470 | H    | -0.225139 | 3.079970  | -2.183762 |
| H    | 2.174935  | 2.110928  | -1.341274 | H    | 2.204261  | 2.222930  | -1.350711 |
| Fe   | -0.229577 | 1.243348  | 0.000000  | Fe   | -0.203466 | 1.230282  | 0.000000  |
| Mn   | 0.189537  | -1.192386 | 0.000000  | Mn   | 0.169990  | -1.215901 | 0.000000  |
| C    | -1.202576 | 0.498635  | 1.264214  | C    | -1.194616 | 0.505274  | 1.263062  |
| C    | 0.703552  | -2.329345 | -1.274094 | C    | 0.712390  | -2.345083 | -1.263442 |
| C    | -1.513878 | -1.936278 | 0.000000  | C    | -1.513279 | -1.989915 | 0.000000  |
| C    | -1.202576 | 0.498635  | -1.264214 | C    | -1.194616 | 0.505274  | -1.263062 |
| C    | 0.703552  | -2.329345 | 1.274094  | C    | 0.712390  | -2.345083 | 1.263442  |
| O    | -1.908594 | 0.212532  | 2.135712  | O    | -1.928815 | 0.258757  | 2.135893  |
| O    | -2.504916 | -2.508761 | 0.000000  | O    | -2.492312 | -2.604025 | 0.000000  |
| O    | 1.038566  | -3.028352 | -2.122363 | O    | 1.074600  | -3.046438 | -2.113619 |
| O    | -1.908594 | 0.212532  | -2.135712 | O    | -1.928815 | 0.258757  | -2.135893 |
| O    | 1.038566  | -3.028352 | 2.122363  | O    | 1.074600  | -3.046438 | 2.113619  |
| O    | 2.916452  | -0.014262 | 0.000000  | O    | 2.895475  | -0.029427 | 0.000000  |
| C    | 1.810319  | -0.341832 | 0.000000  | C    | 1.769255  | -0.331124 | 0.000000  |

**Table S9** Theoretical Cartesian coordinates (in Å) of CpFeMn(CO)<sub>6</sub> **6CO-5S** using the M06-L and BP86 methods

| Atom | M06-L     |           |           | Atom | BP86      |           |           |
|------|-----------|-----------|-----------|------|-----------|-----------|-----------|
|      | X         | Y         | Z         |      | X         | Y         | Z         |
| C    | 1.625800  | -1.694514 | 1.157324  | C    | 1.489598  | -2.122960 | 1.164134  |
| C    | 1.972936  | -0.927454 | 0.000000  | C    | 2.042909  | -1.487866 | 0.000000  |
| C    | 1.625800  | -1.694514 | -1.157324 | C    | 1.489598  | -2.122960 | -1.164134 |
| C    | 0.985544  | -2.864896 | -0.719569 | C    | 0.554006  | -3.090823 | -0.726029 |
| C    | 0.985544  | -2.864896 | 0.719569  | C    | 0.554006  | -3.090823 | 0.726029  |
| H    | 1.767124  | -1.389305 | 2.183242  | H    | 1.711911  | -1.870057 | 2.197159  |
| H    | 2.523976  | 0.006297  | 0.000000  | H    | 2.811906  | -0.718158 | 0.000000  |
| H    | 1.767124  | -1.389305 | -2.183242 | H    | 1.711911  | -1.870057 | -2.197159 |
| H    | 0.574444  | -3.638029 | -1.350316 | H    | -0.047869 | -3.734016 | -1.362737 |
| H    | 0.574444  | -3.638029 | 1.350316  | H    | -0.047869 | -3.734016 | 1.362737  |
| Fe   | -0.078452 | -1.223911 | 0.000000  | Fe   | -0.081376 | -1.205934 | 0.000000  |
| Mn   | 0.123362  | 1.188989  | 0.000000  | Mn   | 0.177281  | 1.253606  | 0.000000  |
| C    | 0.795501  | 2.184254  | -1.362410 | C    | 0.822366  | 2.304674  | -1.327786 |
| C    | -1.364416 | 2.141081  | 0.000000  | C    | -1.336193 | 2.146784  | 0.000000  |
| C    | -0.521766 | -0.045734 | -1.452153 | C    | -0.318908 | -0.008197 | -1.476075 |
| C    | 0.795501  | 2.184254  | 1.362410  | C    | 0.822366  | 2.304674  | 1.327786  |
| O    | 1.186349  | 2.825954  | -2.230562 | O    | 1.222487  | 2.989713  | -2.171303 |
| O    | -2.351605 | 2.729609  | 0.000000  | O    | -2.355435 | 2.703145  | 0.000000  |
| O    | -0.935398 | -0.091494 | -2.544735 | O    | -0.622809 | -0.065920 | -2.616560 |
| O    | 1.186349  | 2.825954  | 2.230562  | O    | 1.222487  | 2.989713  | 2.171303  |
| O    | -2.707301 | -2.479185 | 0.000000  | O    | -2.906884 | -1.948938 | 0.000000  |
| O    | -0.935398 | -0.091494 | 2.544735  | O    | -0.622809 | -0.065920 | 2.616560  |
| C    | -0.521766 | -0.045734 | 1.452153  | C    | -0.318908 | -0.008197 | 1.476075  |
| C    | -1.677906 | -1.973416 | 0.000000  | C    | -1.792929 | -1.636626 | 0.000000  |

**Table S10** Theoretical Cartesian coordinates (in Å) of CpFeMn(CO)<sub>5</sub> **5CO-1S** using the M06-L and BP86 methods

| Atom | M06-L     |           |           | Atom | BP86      |           |           |
|------|-----------|-----------|-----------|------|-----------|-----------|-----------|
|      | X         | Y         | Z         |      | X         | Y         | Z         |
| C    | 0.648243  | -2.600290 | 1.139238  | C    | -2.633692 | 1.163335  | 0.634021  |
| C    | 1.464922  | -2.373931 | 0.000000  | C    | -2.382426 | 0.050906  | 1.499622  |
| C    | 0.648243  | -2.600290 | -1.139238 | C    | -2.608806 | -1.132130 | 0.729832  |
| C    | -0.654664 | -2.983341 | -0.702344 | C    | -3.026113 | -0.747787 | -0.593767 |
| C    | -0.654664 | -2.983341 | 0.702344  | C    | -3.042907 | 0.664247  | -0.652665 |
| H    | 0.946671  | -2.465532 | 2.168575  | H    | -2.519197 | 2.212552  | 0.896037  |
| H    | 2.502128  | -2.076284 | 0.000000  | H    | -2.070991 | 0.096452  | 2.539164  |
| H    | 0.946671  | -2.465532 | -2.168575 | H    | -2.468326 | -2.153765 | 1.074936  |
| H    | -1.499149 | -3.185912 | -1.343454 | H    | -3.244210 | -1.428470 | -1.412567 |
| H    | -1.499149 | -3.185912 | 1.343454  | H    | -3.279139 | 1.269879  | -1.523567 |
| Fe   | -0.120773 | -1.079250 | 0.000000  | Fe   | -1.071130 | 0.002221  | -0.118871 |
| Mn   | 0.033346  | 1.119218  | 0.000000  | Mn   | 1.121911  | -0.000204 | 0.037833  |
| C    | -0.326872 | 2.398769  | 1.212005  | C    | 2.407682  | -1.201656 | -0.317169 |
| C    | -0.326872 | 2.398769  | -1.212005 | C    | 1.321960  | -0.007044 | 1.807833  |
| C    | -0.782371 | -0.194432 | -1.454925 | C    | -0.201088 | -1.437520 | -0.829847 |
| C    | 1.807970  | 1.309249  | 0.000000  | C    | 2.408539  | 1.203251  | -0.307004 |
| O    | -0.554186 | 3.198850  | -2.004911 | O    | 1.429416  | -0.012024 | 2.964553  |
| O    | -0.554186 | 3.198850  | 2.004911  | O    | 3.223004  | -1.996418 | -0.538845 |
| O    | -1.257467 | -0.120840 | -2.512653 | O    | -0.119471 | -2.485398 | -1.347918 |
| O    | 2.955794  | 1.393834  | 0.000000  | O    | 3.224432  | 1.999348  | -0.521751 |
| O    | -1.257467 | -0.120840 | 2.512653  | O    | -0.115856 | 2.490184  | -1.343067 |
| C    | -0.782371 | -0.194432 | 1.454925  | C    | -0.201272 | 1.441924  | -0.826352 |

**Table S11** Theoretical Cartesian coordinates (in Å) of CpFeMn(CO)<sub>5</sub> **5CO-2T** using the M06-L and BP86 methods

| Atom | M06-L     |           |           | Atom | BP86      |           |           |
|------|-----------|-----------|-----------|------|-----------|-----------|-----------|
|      | X         | Y         | Z         |      | X         | Y         | Z         |
| C    | 0.861012  | 2.981467  | 0.711775  | C    | 0.904069  | 2.896710  | 0.715720  |
| C    | -0.481452 | 2.862846  | 1.149118  | C    | -0.455807 | 2.866093  | 1.159747  |
| C    | -1.305606 | 2.786766  | 0.000000  | C    | -1.289947 | 2.834912  | 0.000000  |
| C    | -0.481452 | 2.862846  | -1.149118 | C    | -0.455807 | 2.866093  | -1.159747 |
| C    | 0.861012  | 2.981467  | -0.711775 | C    | 0.904069  | 2.896710  | -0.715720 |
| H    | 1.727756  | 3.042985  | 1.353037  | H    | 1.781319  | 2.896809  | 1.357398  |
| H    | -0.809680 | 2.807561  | 2.176038  | H    | -0.790153 | 2.836274  | 2.193365  |
| H    | -2.377346 | 2.648091  | 0.000000  | H    | -2.375861 | 2.763125  | 0.000000  |
| H    | -0.809680 | 2.807561  | -2.176038 | H    | -0.790153 | 2.836274  | -2.193365 |
| H    | 1.727756  | 3.042985  | -1.353037 | H    | 1.781319  | 2.896809  | -1.357398 |
| Fe   | 0.082471  | 1.131259  | 0.000000  | Fe   | -0.021538 | 1.113257  | 0.000000  |
| Mn   | 0.027995  | -1.183503 | 0.000000  | Mn   | 0.068017  | -1.200938 | 0.000000  |
| C    | 0.439774  | -2.437430 | -1.237355 | C    | 0.398187  | -2.455982 | -1.265400 |
| C    | 0.439774  | -2.437430 | 1.237355  | C    | 0.398187  | -2.455982 | 1.265400  |
| C    | 0.449802  | 0.035834  | -1.522760 | C    | 0.501723  | 0.079534  | -1.485082 |
| C    | -1.725532 | -1.514613 | 0.000000  | C    | -1.693573 | -1.447269 | 0.000000  |
| O    | 0.715459  | -3.228034 | -2.021241 | O    | 0.616953  | -3.257442 | -2.070504 |
| O    | 0.715459  | -3.228034 | 2.021241  | O    | 0.616953  | -3.257442 | 2.070504  |
| O    | 0.756945  | 0.127646  | -2.645949 | O    | 0.868191  | 0.165227  | -2.604101 |
| O    | -2.863026 | -1.689204 | 0.000000  | O    | -2.848271 | -1.579650 | 0.000000  |
| O    | 0.756945  | 0.127646  | 2.645949  | O    | 0.868191  | 0.165227  | 2.604101  |
| C    | 0.449802  | 0.035834  | 1.522760  | C    | 0.501723  | 0.079534  | 1.485082  |

**Table S12** Theoretical Cartesian coordinates (in Å) of CpFeMn(CO)<sub>5</sub> **5CO-3S** using the M06-L and BP86 methods

| Atom | M06-L     |           |           | Atom | BP86      |           |           |
|------|-----------|-----------|-----------|------|-----------|-----------|-----------|
|      | X         | Y         | Z         |      | X         | Y         | Z         |
| C    | 2.879924  | -0.863045 | -0.885908 | C    | 3.106535  | -0.542945 | -0.831278 |
| C    | 1.850300  | -1.753395 | -0.457649 | C    | 2.222913  | -1.645267 | -0.565443 |
| C    | 1.539181  | -1.453932 | 0.894973  | C    | 1.793494  | -1.563687 | 0.799584  |
| C    | 2.354783  | -0.374366 | 1.300310  | C    | 2.388951  | -0.406186 | 1.374534  |
| C    | 3.194269  | -0.017464 | 0.197565  | C    | 3.207575  | 0.217963  | 0.364953  |
| H    | 3.323871  | -0.828991 | -1.868743 | H    | 3.600299  | -0.328366 | -1.774768 |
| H    | 1.374250  | -2.512055 | -1.060385 | H    | 1.925894  | -2.408090 | -1.280557 |
| H    | 0.795008  | -1.948725 | 1.500554  | H    | 1.127599  | -2.257740 | 1.304019  |
| H    | 2.335827  | 0.103662  | 2.267983  | H    | 2.248427  | -0.054498 | 2.392862  |
| H    | 3.918900  | 0.782558  | 0.188886  | H    | 3.786812  | 1.129006  | 0.493423  |
| Fe   | 1.200552  | 0.203806  | -0.326343 | Fe   | 1.199922  | 0.164764  | -0.290288 |
| Mn   | -1.376240 | 0.146890  | -0.171483 | Mn   | -1.303552 | -0.024097 | -0.161456 |
| C    | -1.578375 | -1.578538 | -0.030527 | C    | -2.264337 | -1.496217 | -0.211966 |
| C    | -3.155159 | 0.438465  | -0.087536 | C    | -2.800345 | 0.914417  | 0.069845  |
| C    | -1.016883 | 0.245858  | 1.556055  | C    | -0.927698 | -0.189764 | 1.544378  |
| O    | -1.654486 | -2.727656 | 0.062288  | O    | -2.841130 | -2.507868 | -0.232024 |
| O    | -4.288196 | 0.613435  | -0.009025 | O    | -3.742157 | 1.573224  | 0.241108  |
| O    | -0.790935 | 0.290490  | 2.687748  | O    | -0.757950 | -0.316060 | 2.691672  |
| O    | 1.174271  | 3.049623  | 0.285988  | O    | 0.892670  | 3.017599  | 0.273459  |
| O    | -0.963361 | 0.505728  | -2.241702 | O    | -0.821370 | 0.245794  | -2.384895 |
| C    | 0.047432  | 0.361029  | -1.613889 | C    | 0.116488  | 0.188587  | -1.643721 |
| C    | 1.155439  | 1.925287  | 0.036827  | C    | 0.966639  | 1.879224  | 0.054839  |

**Table S13** Theoretical Cartesian coordinates (in Å) of CpFeMn(CO)<sub>5</sub> **5CO-4S** using the M06-L and BP86 methods

| Atom | M06-L     |           |           | Atom | BP86      |           |           |
|------|-----------|-----------|-----------|------|-----------|-----------|-----------|
|      | X         | Y         | Z         |      | X         | Y         | Z         |
| C    | -3.041422 | 0.377771  | 0.578901  | C    | -3.131039 | 0.205534  | 0.558937  |
| C    | -2.043705 | -0.129771 | 1.472112  | C    | -2.100357 | -0.212226 | 1.483187  |
| C    | -1.593803 | -1.381296 | 0.971786  | C    | -1.528728 | -1.432107 | 0.993613  |
| C    | -2.263172 | -1.611454 | -0.256610 | C    | -2.157937 | -1.726989 | -0.254504 |
| C    | -3.159181 | -0.522498 | -0.490696 | C    | -3.148964 | -0.714386 | -0.513753 |
| H    | -3.564640 | 1.315717  | 0.685833  | H    | -3.749664 | 1.093853  | 0.655687  |
| H    | -1.708124 | 0.345722  | 2.381511  | H    | -1.835700 | 0.288924  | 2.410499  |
| H    | -0.880223 | -2.037574 | 1.445436  | H    | -0.782338 | -2.040131 | 1.495387  |
| H    | -2.105188 | -2.448842 | -0.919957 | H    | -1.920687 | -2.562544 | -0.908610 |
| H    | -3.785635 | -0.399496 | -1.361466 | H    | -3.775133 | -0.652441 | -1.400542 |
| Fe   | -1.193980 | 0.149179  | -0.365667 | Fe   | -1.217517 | 0.156603  | -0.350618 |
| Mn   | 1.217831  | -0.098278 | -0.100869 | Mn   | 1.239508  | -0.074111 | -0.065220 |
| C    | 2.220680  | -1.560564 | -0.162657 | C    | 2.248468  | -1.518075 | -0.212389 |
| C    | 0.247817  | -0.171160 | -1.662501 | C    | 0.258505  | -0.086084 | -1.607763 |
| C    | 2.665443  | 0.910484  | -0.376287 | C    | 2.669586  | 0.919440  | -0.417618 |
| C    | 1.166255  | -0.015019 | 1.708475  | C    | 1.313431  | 0.023290  | 1.746786  |
| C    | -0.654784 | 1.807663  | -0.042342 | C    | -0.880706 | 1.862057  | -0.023188 |
| O    | 2.824362  | -2.541442 | -0.192034 | O    | 2.862595  | -2.501875 | -0.308083 |
| O    | -0.639273 | -0.010793 | -2.437677 | O    | -0.588172 | 0.060160  | -2.444562 |
| O    | 3.564564  | 1.602105  | -0.570638 | O    | 3.571006  | 1.608930  | -0.668120 |
| O    | 1.098679  | 0.000432  | 2.857174  | O    | 1.362272  | 0.064966  | 2.905620  |
| O    | -0.426241 | 2.896927  | 0.262752  | O    | -0.772987 | 2.984157  | 0.261934  |

**Table S14** Theoretical harmonic vibrational frequencies ( $\text{cm}^{-1}$ ) and IR intensities ( $\text{km/mol}$ ) of  $\text{CpFeMn}(\text{CO})_n$  ( $n = 7, 6, 5$ ) by M06-L and BP86 methods

|                                          | M06-L            | BP86            |
|------------------------------------------|------------------|-----------------|
| <b>CpFeMn(CO)<sub>7</sub><br/>7CO-1S</b> | 12.1 (A", 0.1)   | 9.8 (A, 0.2)    |
|                                          | 54.5 (A', 0.2)   | 39.1 (A, 0.3)   |
|                                          | 69.2 (A", 0.1)   | 50.2 (A, 0.0)   |
|                                          | 70.4 (A', 0.1)   | 54.1 (A, 0.2)   |
|                                          | 71.5 (A", 0.1)   | 63.7 (A, 0.1)   |
|                                          | 80.2 (A", 0.2)   | 71.9 (A, 0.0)   |
|                                          | 85.5 (A', 0.2)   | 78.2 (A, 0.1)   |
|                                          | 93.6 (A", 0.0)   | 89.3 (A, 0.1)   |
|                                          | 97.1 (A', 0.9)   | 97.2 (A, 0.3)   |
|                                          | 100.1 (A", 0.4)  | 100.8 (A, 0.6)  |
|                                          | 106.5 (A', 0.0)  | 102.2 (A, 0.5)  |
|                                          | 111.2 (A', 0.1)  | 102.8 (A, 0.1)  |
|                                          | 112.0 (A", 0.0)  | 108.4 (A, 0.4)  |
|                                          | 114.0 (A', 0.9)  | 115.2 (A, 0.5)  |
|                                          | 128.5 (A", 0.1)  | 125.9 (A, 0.2)  |
|                                          | 140.1 (A', 3.0)  | 132.2 (A, 3.2)  |
|                                          | 166.8 (A', 0.7)  | 162.9 (A, 0.7)  |
|                                          | 360.5 (A', 1.8)  | 333.0 (A, 3.2)  |
|                                          | 376.5 (A", 3.7)  | 357.4 (A, 3.3)  |
|                                          | 392.6 (A", 0.1)  | 385.3 (A, 0.5)  |
|                                          | 413.6 (A', 0.4)  | 388.5 (A, 0.1)  |
|                                          | 414.0 (A", 0.0)  | 397.6 (A, 6.9)  |
|                                          | 427.4 (A', 7.8)  | 420.7 (A, 0.3)  |
|                                          | 433.0 (A', 0.7)  | 439.6 (A, 5.3)  |
|                                          | 438.4 (A', 1.2)  | 442.8 (A, 2.9)  |
|                                          | 457.6 (A", 0.1)  | 447.6 (A, 0.7)  |
|                                          | 472.7 (A', 19.9) | 466.4 (A, 5.5)  |
|                                          | 473.4 (A", 8.0)  | 493.9 (A, 5.8)  |
|                                          | 484.0 (A', 13.3) | 496.5 (A, 8.3)  |
|                                          | 506.6 (A', 0.1)  | 507.9 (A, 2.1)  |
|                                          | 514.4 (A", 0.1)  | 509.1 (A, 8.4)  |
|                                          | 515.9 (A', 13.2) | 523.3 (A, 16.5) |
|                                          | 559.6 (A", 3.8)  | 552.0 (A, 6.8)  |
|                                          | 573.4 (A", 35.0) | 563.3 (A, 4.1)  |
| 580.5 (A", 0.9)                          | 571.1 (A, 24.4)  |                 |
| 584.3 (A', 63.8)                         | 578.5 (A, 35.5)  |                 |
| 597.4 (A', 62.2)                         | 581.5 (A, 34.4)  |                 |
| 616.3 (A", 2.8)                          | 586.9 (A, 9.8)   |                 |
| 618.1 (A', 54.5)                         | 592.6 (A, 48.9)  |                 |
| 648.6 (A', 33.8)                         | 640.0 (A, 30.6)  |                 |
| 673.0 (A', 111.7)                        | 673.5 (A, 110.5) |                 |



|                                          |                                                                                                                                                                                                                                                                                                                                                                                                                                                                                                                                                                                                                                                     |                                                                                                                                                                                                                                                                                                                                                                                                                                                                                                                                                                                                                     |
|------------------------------------------|-----------------------------------------------------------------------------------------------------------------------------------------------------------------------------------------------------------------------------------------------------------------------------------------------------------------------------------------------------------------------------------------------------------------------------------------------------------------------------------------------------------------------------------------------------------------------------------------------------------------------------------------------------|---------------------------------------------------------------------------------------------------------------------------------------------------------------------------------------------------------------------------------------------------------------------------------------------------------------------------------------------------------------------------------------------------------------------------------------------------------------------------------------------------------------------------------------------------------------------------------------------------------------------|
|                                          | 689.3 (A", 98.8)<br>693.0 (A', 242.1)<br>833.7 (A", 0.0)<br>833.8 (A', 1.0)<br>848.4 (A', 14.7)<br>855.2 (A', 27.5)<br>873.9 (A", 5.8)<br>934.3 (A", 0.3)<br>934.5 (A', 3.3)<br>1027.0 (A', 3.2)<br>1040.5 (A", 3.9)<br>1083.8 (A", 0.0)<br>1086.6 (A', 2.7)<br>1148.7 (A', 4.8)<br>1277.8 (A", 0.0)<br>1406.3 (A', 3.4)<br>1408.7 (A", 0.8)<br>1462.7 (A', 4.2)<br>1464.5 (A", 2.2)<br>2022.7 (A", 32.6)<br>2035.1 (A', 178.9)<br>2043.0 (A', 762.0)<br>2055.4 (A", 1767.2)<br>2064.2 (A', 279.4)<br>2069.2 (A', 1431.6)<br>2142.1 (A', 437.0)<br>3226.9 (A', 0.3)<br>3229.8 (A", 0.2)<br>3245.8 (A", 0.3)<br>3249.5 (A', 0.9)<br>3257.9 (A', 0.0) | 680.8 (A, 94.1)<br>684.8 (A, 247.8)<br>818.5 (A, 12.7)<br>822.8 (A, 2.8)<br>826.0 (A, 26.5)<br>835.1 (A, 11.8)<br>844.3 (A, 7.2)<br>903.1 (A, 0.6)<br>911.3 (A, 1.0)<br>991.0 (A, 5.0)<br>1004.3 (A, 4.2)<br>1050.8 (A, 0.2)<br>1052.4 (A, 2.5)<br>1111.7 (A, 1.6)<br>1244.6 (A, 0.0)<br>1350.5 (A, 2.0)<br>1355.5 (A, 0.6)<br>1407.8 (A, 3.1)<br>1419.0 (A, 6.7)<br>1948.4 (A, 13.3)<br>1968.2 (A, 367.6)<br>1972.6 (A, 793.4)<br>1979.8 (A, 929.8)<br>1992.7 (A, 1428.8)<br>2005.4 (A, 487.2)<br>2072.5 (A, 477.7)<br>3153.4 (A, 0.2)<br>3159.7 (A, 0.0)<br>3170.8 (A, 0.9)<br>3172.4 (A, 0.2)<br>3184.1 (A, 0.1) |
| <b>CpFeMn(CO)<sub>7</sub><br/>7CO-2S</b> | 16.6 (A", 0.6)<br>45.0 (A", 0.1)<br>56.3 (A", 0.0)<br>62.6 (A', 0.4)<br>73.4 (A', 0.0)<br>79.2 (A", 0.0)<br>85.3 (A", 0.2)<br>89.4 (A', 0.2)<br>90.5 (A", 0.1)<br>97.5 (A", 0.3)<br>99.3 (A', 0.6)<br>102.4 (A', 0.8)<br>111.9 (A', 0.0)                                                                                                                                                                                                                                                                                                                                                                                                            | 26.9 (A", 0.4)<br>39.1 (A", 0.2)<br>49.4 (A", 0.0)<br>56.8 (A', 0.4)<br>74.7 (A', 0.0)<br>86.7 (A", 0.2)<br>92.1 (A', 0.2)<br>92.7 (A", 0.0)<br>96.1 (A", 0.0)<br>97.1 (A', 0.3)<br>102.3 (A", 0.2)<br>104.4 (A', 0.7)<br>107.3 (A', 0.3)                                                                                                                                                                                                                                                                                                                                                                           |

|                   |                   |
|-------------------|-------------------|
| 148.5 (A', 0.3)   | 145.8 (A', 0.3)   |
| 199.8 (A", 1.3)   | 201.1 (A", 1.4)   |
| 215.4 (A', 0.8)   | 215.5 (A', 1.0)   |
| 238.5 (A', 1.1)   | 238.9 (A', 1.4)   |
| 318.4 (A", 0.8)   | 305.9 (A", 0.1)   |
| 344.9 (A', 4.6)   | 311.5 (A', 6.0)   |
| 373.4 (A", 8.4)   | 353.0 (A", 10.5)  |
| 393.1 (A', 8.3)   | 379.9 (A', 0.5)   |
| 399.9 (A", 0.3)   | 398.3 (A", 0.2)   |
| 405.3 (A', 8.5)   | 404.6 (A', 17.4)  |
| 423.7 (A', 0.8)   | 423.2 (A', 0.3)   |
| 425.1 (A', 2.7)   | 432.7 (A", 0.4)   |
| 437.1 (A", 1.0)   | 439.5 (A', 1.3)   |
| 468.2 (A', 20.0)  | 477.7 (A", 0.0)   |
| 479.8 (A", 2.7)   | 484.2 (A', 5.5)   |
| 480.2 (A', 28.8)  | 491.3 (A', 22.1)  |
| 497.3 (A", 10.3)  | 494.9 (A", 6.9)   |
| 518.7 (A', 1.4)   | 509.4 (A", 10.3)  |
| 522.8 (A", 11.1)  | 523.8 (A', 10.3)  |
| 552.5 (A', 17.9)  | 537.2 (A', 17.6)  |
| 555.4 (A', 43.9)  | 553.7 (A', 26.4)  |
| 581.8 (A", 3.0)   | 564.7 (A", 3.1)   |
| 589.8 (A', 5.2)   | 575.6 (A", 0.1)   |
| 590.6 (A", 6.8)   | 578.1 (A', 5.9)   |
| 614.9 (A', 37.3)  | 595.0 (A', 10.4)  |
| 619.7 (A", 11.2)  | 596.9 (A", 13.6)  |
| 638.9 (A', 419.6) | 634.5 (A', 421.5) |
| 651.7 (A', 178.1) | 648.2 (A', 162.5) |
| 680.9 (A', 242.0) | 677.6 (A', 268.7) |
| 683.3 (A", 86.3)  | 682.4 (A", 86.0)  |
| 835.4 (A", 1.9)   | 814.0 (A", 3.4)   |
| 837.6 (A', 5.1)   | 816.3 (A', 67.3)  |
| 838.1 (A", 3.5)   | 823.0 (A", 1.7)   |
| 846.6 (A', 44.9)  | 823.8 (A', 0.3)   |
| 880.5 (A', 5.4)   | 861.1 (A', 4.9)   |
| 929.3 (A", 0.2)   | 905.3 (A", 0.2)   |
| 942.7 (A', 2.9)   | 917.7 (A', 3.1)   |
| 1031.3 (A', 2.6)  | 995.5 (A', 3.4)   |
| 1038.5 (A", 5.9)  | 1006.8 (A", 7.7)  |
| 1082.1 (A', 2.0)  | 1052.0 (A', 1.9)  |
| 1084.9 (A", 0.5)  | 1053.5 (A", 0.5)  |
| 1152.6 (A', 1.8)  | 1115.7 (A', 0.5)  |
| 1278.2 (A", 0.0)  | 1246.1 (A", 0.0)  |
| 1407.7 (A', 0.7)  | 1353.4 (A', 0.8)  |

|                                          |                                                                                                                                                                                                                                                                                                                                                                                                                                                                                                                               |                                                                                                                                                                                                                                                                                                                                                                                                                                                                                                                              |
|------------------------------------------|-------------------------------------------------------------------------------------------------------------------------------------------------------------------------------------------------------------------------------------------------------------------------------------------------------------------------------------------------------------------------------------------------------------------------------------------------------------------------------------------------------------------------------|------------------------------------------------------------------------------------------------------------------------------------------------------------------------------------------------------------------------------------------------------------------------------------------------------------------------------------------------------------------------------------------------------------------------------------------------------------------------------------------------------------------------------|
|                                          | 1409.1 (A", 0.0)<br>1459.7 (A', 3.7)<br>1472.3 (A", 1.1)<br>1892.5 (A", 860.3)<br>1916.7 (A', 20.4)<br>2041.8 (A', 650.4)<br>2060.9 (A', 516.0)<br>2063.1 (A", 950.6)<br>2075.0 (A', 1203.7)<br>2141.9 (A', 649.3)<br>3226.8 (A', 0.5)<br>3227.7 (A", 0.0)<br>3240.7 (A', 0.6)<br>3249.5 (A", 0.1)<br>3256.0 (A', 0.1)                                                                                                                                                                                                        | 1354.0 (A", 0.1)<br>1408.0 (A', 5.9)<br>1425.7 (A", 2.3)<br>1821.8 (A", 779.7)<br>1844.0 (A', 12.4)<br>1970.5 (A', 631.1)<br>1988.4 (A', 625.6)<br>1992.4 (A", 851.4)<br>2001.8 (A', 933.8)<br>2067.7 (A', 622.8)<br>3152.3 (A', 0.4)<br>3155.7 (A", 0.0)<br>3166.5 (A', 0.4)<br>3172.8 (A", 0.5)<br>3180.1 (A', 0.1)                                                                                                                                                                                                        |
| CpFeMn(CO) <sub>7</sub><br><b>7CO-3S</b> | 21.3 (A, 0.2)<br>35.8 (A, 0.0)<br>39.4 (A, 0.1)<br>42.4 (A, 0.1)<br>59.4 (A, 0.2)<br>70.6 (A, 0.4)<br>73.1 (A, 0.1)<br>75.0 (A, 0.1)<br>83.5 (A, 0.0)<br>92.3 (A, 0.5)<br>94.9 (A, 0.6)<br>100.8 (A, 0.1)<br>122.9 (A, 0.1)<br>130.0 (A, 0.1)<br>170.6 (A, 0.0)<br>192.3 (A, 1.1)<br>304.9 (A, 0.6)<br>353.3 (A, 0.9)<br>367.9 (A, 3.4)<br>376.7 (A, 0.7)<br>389.4 (A, 8.0)<br>401.1 (A, 15.8)<br>428.4 (A, 4.7)<br>439.2 (A, 6.6)<br>449.8 (A, 4.5)<br>456.8 (A, 5.9)<br>465.2 (A, 16.0)<br>471.9 (A, 1.3)<br>502.3 (A, 3.8) | 15.2 (A, 0.2)<br>27.9 (A, 0.1)<br>35.2 (A, 0.0)<br>38.8 (A, 0.3)<br>56.2 (A, 0.4)<br>71.5 (A, 0.4)<br>74.4 (A, 0.1)<br>78.1 (A, 0.1)<br>86.2 (A, 0.0)<br>95.4 (A, 0.4)<br>98.3 (A, 0.4)<br>106.4 (A, 0.1)<br>120.4 (A, 0.2)<br>130.6 (A, 0.1)<br>171.1 (A, 0.0)<br>188.7 (A, 0.3)<br>295.6 (A, 2.1)<br>336.1 (A, 4.4)<br>349.9 (A, 0.4)<br>362.0 (A, 2.7)<br>374.1 (A, 0.4)<br>395.5 (A, 26.0)<br>434.3 (A, 2.2)<br>444.3 (A, 2.2)<br>445.7 (A, 0.2)<br>451.5 (A, 3.1)<br>475.9 (A, 4.1)<br>476.5 (A, 5.4)<br>501.7 (A, 1.9) |

|                         |                    |                    |
|-------------------------|--------------------|--------------------|
|                         | 506.1 (A, 2.4)     | 504.2 (A, 12.5)    |
|                         | 514.1 (A, 19.3)    | 523.9 (A, 11.3)    |
|                         | 543.5 (A, 4.4)     | 534.0 (A, 2.4)     |
|                         | 553.6 (A, 9.7)     | 545.0 (A, 3.3)     |
|                         | 578.8 (A, 19.0)    | 571.2 (A, 13.1)    |
|                         | 591.4 (A, 60.9)    | 580.0 (A, 5.4)     |
|                         | 601.6 (A, 85.3)    | 580.7 (A, 50.7)    |
|                         | 612.1 (A, 7.9)     | 589.8 (A, 62.4)    |
|                         | 616.4 (A, 7.1)     | 602.0 (A, 27.0)    |
|                         | 642.4 (A, 38.5)    | 635.5 (A, 23.8)    |
|                         | 655.3 (A, 73.5)    | 647.9 (A, 87.1)    |
|                         | 674.0 (A, 73.3)    | 668.5 (A, 63.0)    |
|                         | 692.2 (A, 78.3)    | 686.0 (A, 66.0)    |
|                         | 742.2 (A, 398.6)   | 723.1 (A, 411.9)   |
|                         | 834.1 (A, 7.3)     | 813.6 (A, 43.9)    |
|                         | 840.3 (A, 1.7)     | 820.8 (A, 4.3)     |
|                         | 843.2 (A, 17.1)    | 825.1 (A, 0.9)     |
|                         | 853.6 (A, 43.3)    | 828.3 (A, 41.9)    |
|                         | 880.9 (A, 7.7)     | 859.6 (A, 7.0)     |
|                         | 940.6 (A, 1.1)     | 913.5 (A, 0.3)     |
|                         | 941.0 (A, 1.2)     | 917.2 (A, 1.5)     |
|                         | 1028.5 (A, 4.0)    | 999.0 (A, 4.6)     |
|                         | 1040.7 (A, 4.2)    | 1003.9 (A, 6.3)    |
|                         | 1083.2 (A, 1.0)    | 1051.9 (A, 0.2)    |
|                         | 1083.6 (A, 0.4)    | 1053.6 (A, 1.4)    |
|                         | 1152.4 (A, 1.1)    | 1114.9 (A, 0.2)    |
|                         | 1278.5 (A, 0.0)    | 1246.5 (A, 0.0)    |
|                         | 1406.0 (A, 4.5)    | 1351.1 (A, 1.6)    |
|                         | 1408.2 (A, 1.4)    | 1353.4 (A, 6.4)    |
|                         | 1461.9 (A, 2.2)    | 1411.6 (A, 5.1)    |
|                         | 1474.8 (A, 2.2)    | 1421.9 (A, 2.5)    |
|                         | 1642.9 (A, 140.1)  | 1571.1 (A, 138.1)  |
|                         | 2004.9 (A, 714.3)  | 1938.2 (A, 657.2)  |
|                         | 2027.4 (A, 1110.2) | 1958.3 (A, 1064.4) |
|                         | 2050.4 (A, 587.0)  | 1981.1 (A, 515.0)  |
|                         | 2072.4 (A, 954.1)  | 1995.5 (A, 907.2)  |
|                         | 2099.5 (A, 1239.9) | 2027.3 (A, 1092.3) |
|                         | 2126.2 (A, 307.4)  | 2052.1 (A, 291.6)  |
|                         | 3227.2 (A, 0.3)    | 3153.5 (A, 0.3)    |
|                         | 3229.3 (A, 0.1)    | 3156.9 (A, 0.0)    |
|                         | 3242.4 (A, 0.2)    | 3171.4 (A, 0.0)    |
|                         | 3246.8 (A, 0.1)    | 3173.9 (A, 0.2)    |
|                         | 3255.6 (A, 0.3)    | 3183.0 (A, 0.2)    |
| CpFeMn(CO) <sub>7</sub> | 8.9 (A, 0.2)       | 12.7 (A, 0.3)      |

|               |                                                                                                                                                                                                                                                                                                                                                                                                                                                                                                                                                                                                                                                                                                                                                                                                                           |                                                                                                                                                                                                                                                                                                                                                                                                                                                                                                                                                                                                                                                                                                                                                                                                                         |
|---------------|---------------------------------------------------------------------------------------------------------------------------------------------------------------------------------------------------------------------------------------------------------------------------------------------------------------------------------------------------------------------------------------------------------------------------------------------------------------------------------------------------------------------------------------------------------------------------------------------------------------------------------------------------------------------------------------------------------------------------------------------------------------------------------------------------------------------------|-------------------------------------------------------------------------------------------------------------------------------------------------------------------------------------------------------------------------------------------------------------------------------------------------------------------------------------------------------------------------------------------------------------------------------------------------------------------------------------------------------------------------------------------------------------------------------------------------------------------------------------------------------------------------------------------------------------------------------------------------------------------------------------------------------------------------|
| <b>7CO-4S</b> | 31.7 (A, 0.1)<br>39.8 (A, 0.1)<br>54.6 (A, 0.1)<br>57.2 (A, 0.0)<br>69.9 (A, 0.0)<br>73.7 (A, 0.3)<br>76.0 (A, 0.5)<br>85.8 (A, 0.3)<br>91.8 (A, 0.4)<br>93.3 (A, 0.4)<br>97.9 (A, 0.2)<br>120.2 (A, 0.1)<br>124.3 (A, 0.7)<br>173.2 (A, 0.2)<br>183.3 (A, 1.2)<br>296.7 (A, 0.6)<br>351.8 (A, 0.5)<br>366.5 (A, 11.0)<br>382.6 (A, 10.8)<br>387.9 (A, 12.5)<br>402.0 (A, 4.1)<br>427.9 (A, 5.6)<br>444.4 (A, 1.3)<br>451.8 (A, 4.8)<br>457.2 (A, 15.2)<br>464.7 (A, 4.3)<br>469.8 (A, 1.7)<br>498.5 (A, 13.1)<br>503.9 (A, 1.7)<br>514.8 (A, 7.4)<br>541.5 (A, 6.9)<br>545.8 (A, 8.8)<br>572.3 (A, 44.3)<br>577.3 (A, 35.0)<br>609.1 (A, 0.8)<br>615.8 (A, 45.0)<br>619.7 (A, 29.1)<br>640.5 (A, 10.7)<br>656.0 (A, 103.7)<br>671.6 (A, 53.6)<br>691.1 (A, 71.8)<br>749.7 (A, 493.0)<br>835.6 (A, 9.7)<br>838.0 (A, 6.2) | 30.6 (A, 0.2)<br>36.4 (A, 0.1)<br>40.7 (A, 0.2)<br>55.0 (A, 0.0)<br>69.3 (A, 0.0)<br>75.6 (A, 0.3)<br>80.0 (A, 0.6)<br>86.6 (A, 0.1)<br>92.7 (A, 0.2)<br>97.5 (A, 0.5)<br>102.4 (A, 0.0)<br>120.5 (A, 0.5)<br>124.1 (A, 0.3)<br>170.8 (A, 0.0)<br>180.8 (A, 0.7)<br>289.2 (A, 0.5)<br>335.5 (A, 9.1)<br>344.6 (A, 1.7)<br>364.3 (A, 17.6)<br>378.0 (A, 15.0)<br>383.7 (A, 3.6)<br>439.0 (A, 0.3)<br>443.9 (A, 2.9)<br>447.0 (A, 1.3)<br>458.5 (A, 2.7)<br>472.0 (A, 4.5)<br>475.6 (A, 5.1)<br>500.1 (A, 2.1)<br>508.5 (A, 15.7)<br>510.2 (A, 7.4)<br>530.9 (A, 3.6)<br>538.1 (A, 8.9)<br>570.3 (A, 15.0)<br>574.8 (A, 34.2)<br>582.1 (A, 5.9)<br>586.6 (A, 3.4)<br>605.1 (A, 56.3)<br>635.3 (A, 3.9)<br>650.8 (A, 122.0)<br>664.9 (A, 36.4)<br>685.2 (A, 57.7)<br>731.1 (A, 537.6)<br>816.9 (A, 40.2)<br>822.2 (A, 3.0) |
|---------------|---------------------------------------------------------------------------------------------------------------------------------------------------------------------------------------------------------------------------------------------------------------------------------------------------------------------------------------------------------------------------------------------------------------------------------------------------------------------------------------------------------------------------------------------------------------------------------------------------------------------------------------------------------------------------------------------------------------------------------------------------------------------------------------------------------------------------|-------------------------------------------------------------------------------------------------------------------------------------------------------------------------------------------------------------------------------------------------------------------------------------------------------------------------------------------------------------------------------------------------------------------------------------------------------------------------------------------------------------------------------------------------------------------------------------------------------------------------------------------------------------------------------------------------------------------------------------------------------------------------------------------------------------------------|

|                                          |                                                                                                                                                                                                                                                                                                                                                                                                                                                                                                                                           |                                                                                                                                                                                                                                                                                                                                                                                                                                                                                                                                         |
|------------------------------------------|-------------------------------------------------------------------------------------------------------------------------------------------------------------------------------------------------------------------------------------------------------------------------------------------------------------------------------------------------------------------------------------------------------------------------------------------------------------------------------------------------------------------------------------------|-----------------------------------------------------------------------------------------------------------------------------------------------------------------------------------------------------------------------------------------------------------------------------------------------------------------------------------------------------------------------------------------------------------------------------------------------------------------------------------------------------------------------------------------|
|                                          | 851.7 (A, 25.2)<br>855.8 (A, 3.1)<br>867.9 (A, 13.2)<br>928.7 (A, 1.4)<br>948.3 (A, 3.0)<br>1023.7 (A, 5.0)<br>1042.1 (A, 3.5)<br>1082.3 (A, 0.4)<br>1086.9 (A, 1.8)<br>1148.9 (A, 1.6)<br>1279.4 (A, 0.0)<br>1404.3 (A, 2.7)<br>1407.8 (A, 0.8)<br>1459.9 (A, 1.8)<br>1476.6 (A, 3.4)<br>1636.9 (A, 138.4)<br>2016.3 (A, 620.7)<br>2025.8 (A, 1122.5)<br>2050.2 (A, 547.0)<br>2068.8 (A, 909.1)<br>2095.5 (A, 837.8)<br>2126.8 (A, 611.4)<br>3230.0 (A, 0.1)<br>3232.1 (A, 0.1)<br>3245.4 (A, 0.4)<br>3248.0 (A, 0.0)<br>3256.9 (A, 0.1) | 829.1 (A, 14.2)<br>835.0 (A, 3.0)<br>841.2 (A, 7.3)<br>905.6 (A, 1.1)<br>911.6 (A, 2.6)<br>988.7 (A, 6.0)<br>1006.3 (A, 5.3)<br>1051.1 (A, 1.4)<br>1052.3 (A, 0.5)<br>1110.8 (A, 0.4)<br>1245.7 (A, 0.0)<br>1349.0 (A, 2.1)<br>1352.4 (A, 1.7)<br>1407.1 (A, 3.8)<br>1424.2 (A, 5.9)<br>1565.3 (A, 132.4)<br>1948.2 (A, 581.9)<br>1957.1 (A, 1034.8)<br>1981.0 (A, 503.3)<br>1992.0 (A, 861.4)<br>2022.7 (A, 752.9)<br>2053.3 (A, 553.1)<br>3155.0 (A, 0.1)<br>3160.1 (A, 0.1)<br>3170.3 (A, 0.1)<br>3172.2 (A, 0.4)<br>3181.7 (A, 0.1) |
| CpFeMn(CO) <sub>6</sub><br><b>6CO-1S</b> | 40.8 (A', 0.3)<br>45.5 (A'', 0.0)<br>64.5 (A'', 0.1)<br>76.9 (A', 0.0)<br>82.3 (A'', 0.1)<br>83.0 (A', 0.1)<br>90.1 (A', 0.3)<br>95.0 (A'', 0.1)<br>98.7 (A'', 0.4)<br>100.8 (A', 2.0)<br>106.2 (A', 0.7)<br>133.7 (A'', 0.2)<br>156.4 (A'', 0.0)<br>186.3 (A', 3.0)<br>213.2 (A', 0.4)<br>348.5 (A', 5.3)<br>404.5 (A'', 0.6)                                                                                                                                                                                                            | 34.6 (A, 0.1)<br>35.5 (A, 0.1)<br>60.5 (A, 0.0)<br>68.2 (A, 0.2)<br>80.9 (A, 0.0)<br>82.5 (A, 0.0)<br>93.1 (A, 0.1)<br>93.3 (A, 0.3)<br>99.9 (A, 2.0)<br>102.1 (A, 0.3)<br>106.0 (A, 0.4)<br>129.7 (A, 0.3)<br>161.1 (A, 0.0)<br>168.1 (A, 3.3)<br>217.9 (A, 0.2)<br>328.8 (A, 5.2)<br>375.7 (A, 2.2)                                                                                                                                                                                                                                   |

|                     |                    |
|---------------------|--------------------|
| 418.1 (A", 0.5)     | 402.8 (A, 1.3)     |
| 425.7 (A', 0.7)     | 410.5 (A, 0.0)     |
| 429.9 (A', 0.8)     | 427.3 (A, 1.0)     |
| 435.2 (A', 2.6)     | 434.3 (A, 0.0)     |
| 435.9 (A", 0.9)     | 444.2 (A, 1.4)     |
| 457.6 (A", 4.5)     | 448.1 (A, 0.0)     |
| 473.7 (A", 25.8)    | 493.7 (A, 0.8)     |
| 497.1 (A', 0.6)     | 500.3 (A, 23.9)    |
| 499.0 (A", 1.0)     | 500.4 (A, 1.2)     |
| 506.3 (A', 3.2)     | 506.6 (A, 2.9)     |
| 509.8 (A', 12.2)    | 515.6 (A, 13.4)    |
| 549.2 (A', 9.6)     | 538.9 (A, 8.8)     |
| 586.4 (A", 42.1)    | 574.4 (A, 0.2)     |
| 593.1 (A", 0.4)     | 579.2 (A, 9.9)     |
| 602.4 (A', 184.7)   | 589.8 (A, 24.2)    |
| 607.0 (A", 1.7)     | 589.8 (A, 140.7)   |
| 636.5 (A', 2.1)     | 612.5 (A, 0.9)     |
| 648.6 (A', 78.1)    | 644.5 (A, 85.3)    |
| 655.1 (A", 57.0)    | 648.1 (A, 57.9)    |
| 658.7 (A', 30.2)    | 650.6 (A, 27.7)    |
| 697.2 (A', 97.3)    | 694.0 (A, 97.7)    |
| 814.3 (A", 7.3)     | 791.9 (A, 9.1)     |
| 829.3 (A', 22.5)    | 806.3 (A, 36.9)    |
| 840.3 (A', 11.4)    | 820.8 (A, 8.1)     |
| 851.3 (A", 5.8)     | 830.1 (A, 3.7)     |
| 878.3 (A', 11.3)    | 852.2 (A, 9.1)     |
| 911.9 (A", 0.4)     | 888.2 (A, 2.2)     |
| 947.9 (A", 3.7)     | 890.6 (A, 1.3)     |
| 1028.7 (A', 0.9)    | 993.9 (A, 1.2)     |
| 1062.4 (A", 5.6)    | 1029.1 (A, 7.2)    |
| 1083.4 (A', 2.9)    | 1052.8 (A, 3.4)    |
| 1134.8 (A', 14.9)   | 1097.8 (A, 5.6)    |
| 1149.9 (A', 39.0)   | 1132.5 (A, 40.5)   |
| 1248.0 (A", 0.1)    | 1210.2 (A, 0.2)    |
| 1374.4 (A", 0.9)    | 1312.4 (A, 0.7)    |
| 1397.9 (A', 0.0)    | 1343.1 (A, 0.1)    |
| 1435.2 (A", 2.8)    | 1384.8 (A, 4.4)    |
| 1460.2 (A', 4.2)    | 1406.9 (A, 7.3)    |
| 2022.2 (A", 1.3)    | 1953.1 (A, 0.6)    |
| 2033.4 (A', 262.1)  | 1966.0 (A, 409.8)  |
| 2049.8 (A', 573.4)  | 1977.1 (A, 1809.3) |
| 2052.2 (A", 1914.4) | 1981.4 (A, 398.0)  |
| 2057.8 (A', 1358.2) | 1988.7 (A, 1232.8) |
| 2132.4 (A', 462.6)  | 2059.6 (A, 425.4)  |

|                                          |                                                                                                                                                                                                                                                                                                                                                                                                                                                                                                                                                                                                                                                                                                                                                                                      |                                                                                                                                                                                                                                                                                                                                                                                                                                                                                                                                                                                                                                                                                                                            |
|------------------------------------------|--------------------------------------------------------------------------------------------------------------------------------------------------------------------------------------------------------------------------------------------------------------------------------------------------------------------------------------------------------------------------------------------------------------------------------------------------------------------------------------------------------------------------------------------------------------------------------------------------------------------------------------------------------------------------------------------------------------------------------------------------------------------------------------|----------------------------------------------------------------------------------------------------------------------------------------------------------------------------------------------------------------------------------------------------------------------------------------------------------------------------------------------------------------------------------------------------------------------------------------------------------------------------------------------------------------------------------------------------------------------------------------------------------------------------------------------------------------------------------------------------------------------------|
|                                          | 2741.8 (A', 1.9)<br>3232.0 (A'', 0.2)<br>3240.3 (A', 0.3)<br>3247.7 (A'', 0.0)<br>3255.1 (A', 0.4)                                                                                                                                                                                                                                                                                                                                                                                                                                                                                                                                                                                                                                                                                   | 2554.4 (A, 0.6)<br>3156.6 (A, 0.2)<br>3165.3 (A, 0.2)<br>3172.2 (A, 0.3)<br>3178.2 (A, 0.4)                                                                                                                                                                                                                                                                                                                                                                                                                                                                                                                                                                                                                                |
| CpFeMn(CO) <sub>6</sub><br><b>6CO-2T</b> | 23.9 (A'', 0.0)<br>45.8 (A'', 0.0)<br>60.8 (A', 0.2)<br>61.0 (A'', 0.1)<br>77.2 (A', 0.6)<br>78.3 (A'', 0.4)<br>84.7 (A', 0.8)<br>86.2 (A', 0.2)<br>86.5 (A'', 0.7)<br>114.2 (A', 0.0)<br>123.3 (A'', 0.1)<br>175.7 (A', 0.0)<br>176.2 (A'', 0.0)<br>202.4 (A', 1.9)<br>246.6 (A', 2.4)<br>313.8 (A', 0.2)<br>318.5 (A'', 0.1)<br>345.8 (A'', 3.7)<br>353.8 (A', 3.8)<br>376.4 (A', 4.4)<br>392.4 (A'', 0.0)<br>418.5 (A', 30.7)<br>454.6 (A'', 9.2)<br>455.5 (A', 0.0)<br>456.1 (A'', 3.4)<br>457.1 (A', 15.5)<br>463.6 (A', 69.2)<br>479.8 (A'', 0.2)<br>495.4 (A'', 2.8)<br>499.2 (A', 2.5)<br>545.4 (A', 66.0)<br>547.9 (A'', 5.0)<br>550.6 (A', 117.7)<br>607.7 (A'', 2.5)<br>608.0 (A', 3.1)<br>634.9 (A'', 69.4)<br>635.3 (A', 70.4)<br>651.0 (A', 306.1)<br>829.4 (A', 15.0) | 2.4 (A, 0.0)<br>46.8 (A, 0.0)<br>59.5 (A, 0.2)<br>59.6 (A, 0.2)<br>83.5 (A, 0.1)<br>84.1 (A, 0.1)<br>89.1 (A, 0.7)<br>89.6 (A, 0.3)<br>90.2 (A, 0.7)<br>122.0 (A, 0.0)<br>130.6 (A, 0.0)<br>180.7 (A, 0.1)<br>181.6 (A, 0.0)<br>206.4 (A, 0.4)<br>243.7 (A, 0.1)<br>298.0 (A, 1.6)<br>301.4 (A, 1.0)<br>338.6 (A, 3.8)<br>345.9 (A, 4.2)<br>381.0 (A, 5.1)<br>389.2 (A, 0.0)<br>427.8 (A, 21.9)<br>452.5 (A, 5.7)<br>455.5 (A, 5.2)<br>458.0 (A, 0.6)<br>459.0 (A, 2.0)<br>464.2 (A, 0.2)<br>475.2 (A, 55.6)<br>494.4 (A, 1.5)<br>497.0 (A, 1.4)<br>539.0 (A, 5.7)<br>539.3 (A, 7.9)<br>554.2 (A, 188.9)<br>580.4 (A, 0.6)<br>582.3 (A, 10.0)<br>629.3 (A, 65.1)<br>629.7 (A, 65.4)<br>648.9 (A, 279.1)<br>808.7 (A, 53.3) |



|                                                |                                                                                                                                                                                                                                                                                                                                                                                                                                                                                                                                                                  |                                                                                                                                                                                                                                                                                                                                                                                                                                                                                                                                    |
|------------------------------------------------|------------------------------------------------------------------------------------------------------------------------------------------------------------------------------------------------------------------------------------------------------------------------------------------------------------------------------------------------------------------------------------------------------------------------------------------------------------------------------------------------------------------------------------------------------------------|------------------------------------------------------------------------------------------------------------------------------------------------------------------------------------------------------------------------------------------------------------------------------------------------------------------------------------------------------------------------------------------------------------------------------------------------------------------------------------------------------------------------------------|
|                                                | 836.1 (A', 12.5)<br>837.1 (A", 0.0)<br>840.7 (A', 27.0)<br>850.0 (A", 2.6)<br>920.9 (A", 1.0)<br>922.0 (A', 2.9)<br>1032.5 (A', 7.6)<br>1034.4 (A", 6.3)<br>1081.5 (A", 0.2)<br>1081.7 (A', 0.2)<br>1151.5 (A', 3.9)<br>1278.4 (A", 0.0)<br>1399.5 (A", 0.0)<br>1401.7 (A', 0.4)<br>1465.4 (A', 0.5)<br>1469.7 (A", 1.9)<br>1932.0 (A", 839.6)<br>1932.9 (A', 863.1)<br>1959.7 (A', 54.5)<br>2062.8 (A", 857.2)<br>2063.8 (A', 840.1)<br>2122.5 (A', 1136.2)<br>3226.3 (A", 0.0)<br>3226.8 (A', 0.1)<br>3241.8 (A', 0.1)<br>3242.7 (A", 0.2)<br>3253.2 (A', 0.2) | 818.1 (A, 3.8)<br>822.5 (A, 0.0)<br>823.6 (A, 6.0)<br>833.0 (A, 3.2)<br>899.1 (A, 1.2)<br>901.0 (A, 3.0)<br>999.3 (A, 8.3)<br>1001.5 (A, 7.2)<br>1050.5 (A, 0.3)<br>1050.8 (A, 0.2)<br>1115.5 (A, 1.3)<br>1246.1 (A, 0.0)<br>1347.1 (A, 0.0)<br>1348.2 (A, 0.5)<br>1415.2 (A, 1.6)<br>1418.5 (A, 3.8)<br>1860.3 (A, 742.7)<br>1860.8 (A, 755.2)<br>1886.0 (A, 50.1)<br>1989.3 (A, 778.0)<br>1989.9 (A, 767.1)<br>2044.7 (A, 1058.9)<br>3151.8 (A, 0.0)<br>3151.9 (A, 0.1)<br>3165.1 (A, 0.0)<br>3165.6 (A, 0.0)<br>3176.1 (A, 0.3) |
| <b>CpFeMn(CO)<sub>6</sub></b><br><b>6CO-3S</b> | 36.7 (A, 0.4)<br>50.5 (A, 0.1)<br>70.0 (A, 0.0)<br>72.3 (A, 0.1)<br>77.8 (A, 0.2)<br>84.3 (A, 0.3)<br>92.9 (A, 0.1)<br>99.0 (A, 0.4)<br>104.2 (A, 0.3)<br>108.2 (A, 0.3)<br>122.6 (A, 0.4)<br>130.3 (A, 1.7)<br>146.6 (A, 0.0)<br>182.8 (A, 1.2)<br>247.2 (A, 1.5)<br>361.1 (A, 2.1)<br>400.2 (A, 2.8)                                                                                                                                                                                                                                                           | 35.3 (A, 0.2)<br>37.7 (A, 0.2)<br>47.8 (A, 0.2)<br>67.5 (A, 0.1)<br>71.6 (A, 0.2)<br>83.0 (A, 0.2)<br>86.3 (A, 0.0)<br>99.0 (A, 0.1)<br>100.4 (A, 0.2)<br>103.6 (A, 0.5)<br>116.7 (A, 0.7)<br>121.8 (A, 0.7)<br>141.7 (A, 0.0)<br>167.0 (A, 0.4)<br>224.4 (A, 2.2)<br>339.1 (A, 4.1)<br>374.8 (A, 4.6)                                                                                                                                                                                                                             |

|                    |                    |
|--------------------|--------------------|
| 406.3 (A, 1.5)     | 376.2 (A, 2.3)     |
| 415.4 (A, 3.7)     | 408.6 (A, 0.7)     |
| 422.5 (A, 2.4)     | 412.3 (A, 0.8)     |
| 426.3 (A, 3.3)     | 427.8 (A, 0.2)     |
| 435.9 (A, 1.0)     | 439.5 (A, 2.1)     |
| 456.3 (A, 30.1)    | 455.2 (A, 5.0)     |
| 473.7 (A, 9.0)     | 482.9 (A, 12.6)    |
| 487.2 (A, 3.9)     | 489.2 (A, 9.2)     |
| 506.9 (A, 9.1)     | 504.7 (A, 16.9)    |
| 508.9 (A, 5.1)     | 507.9 (A, 6.8)     |
| 518.1 (A, 7.4)     | 520.0 (A, 7.0)     |
| 545.6 (A, 6.6)     | 534.9 (A, 3.4)     |
| 586.3 (A, 75.2)    | 573.8 (A, 61.3)    |
| 599.6 (A, 17.9)    | 580.7 (A, 33.7)    |
| 603.5 (A, 14.1)    | 581.8 (A, 14.7)    |
| 614.1 (A, 10.0)    | 587.9 (A, 7.0)     |
| 630.2 (A, 60.1)    | 615.0 (A, 56.3)    |
| 650.0 (A, 76.7)    | 641.9 (A, 62.2)    |
| 650.9 (A, 34.7)    | 642.3 (A, 22.6)    |
| 661.4 (A, 158.8)   | 656.8 (A, 138.5)   |
| 693.9 (A, 93.0)    | 688.1 (A, 111.4)   |
| 835.5 (A, 4.7)     | 816.9 (A, 29.9)    |
| 836.2 (A, 0.6)     | 821.6 (A, 1.3)     |
| 850.8 (A, 15.5)    | 822.8 (A, 6.4)     |
| 855.0 (A, 21.7)    | 828.5 (A, 14.6)    |
| 866.3 (A, 8.3)     | 844.2 (A, 7.0)     |
| 920.0 (A, 2.0)     | 896.9 (A, 2.0)     |
| 933.0 (A, 2.2)     | 899.7 (A, 1.2)     |
| 1022.7 (A, 4.4)    | 986.0 (A, 5.1)     |
| 1038.3 (A, 2.9)    | 1004.2 (A, 4.4)    |
| 1080.1 (A, 1.2)    | 1048.2 (A, 0.8)    |
| 1082.5 (A, 0.9)    | 1049.2 (A, 1.2)    |
| 1146.8 (A, 4.5)    | 1108.6 (A, 2.1)    |
| 1275.6 (A, 0.0)    | 1242.8 (A, 0.0)    |
| 1403.1 (A, 1.0)    | 1347.6 (A, 0.8)    |
| 1406.9 (A, 0.2)    | 1351.2 (A, 0.0)    |
| 1453.4 (A, 1.6)    | 1401.1 (A, 3.8)    |
| 1470.2 (A, 2.5)    | 1419.2 (A, 4.3)    |
| 1834.6 (A, 346.5)  | 1777.7 (A, 307.8)  |
| 2020.3 (A, 572.6)  | 1954.3 (A, 511.9)  |
| 2036.7 (A, 541.3)  | 1964.6 (A, 539.8)  |
| 2048.8 (A, 494.5)  | 1976.4 (A, 575.9)  |
| 2060.9 (A, 1656.8) | 1986.8 (A, 1408.5) |
| 2132.2 (A, 546.4)  | 2058.5 (A, 519.2)  |

|                                          |                                                                                                                                                                                                                                                                                                                                                                                                                                                                                                                                                                                                                                                                                                                                                                        |                                                                                                                                                                                                                                                                                                                                                                                                                                                                                                                                                                                                                                                                                                                                                                         |
|------------------------------------------|------------------------------------------------------------------------------------------------------------------------------------------------------------------------------------------------------------------------------------------------------------------------------------------------------------------------------------------------------------------------------------------------------------------------------------------------------------------------------------------------------------------------------------------------------------------------------------------------------------------------------------------------------------------------------------------------------------------------------------------------------------------------|-------------------------------------------------------------------------------------------------------------------------------------------------------------------------------------------------------------------------------------------------------------------------------------------------------------------------------------------------------------------------------------------------------------------------------------------------------------------------------------------------------------------------------------------------------------------------------------------------------------------------------------------------------------------------------------------------------------------------------------------------------------------------|
|                                          | 3228.4 (A, 0.1)<br>3229.5 (A, 0.2)<br>3243.1 (A, 1.1)<br>3246.2 (A, 0.7)<br>3254.8 (A, 0.4)                                                                                                                                                                                                                                                                                                                                                                                                                                                                                                                                                                                                                                                                            | 3154.3 (A, 0.1)<br>3155.3 (A, 0.1)<br>3166.9 (A, 0.6)<br>3170.4 (A, 0.3)<br>3178.7 (A, 0.5)                                                                                                                                                                                                                                                                                                                                                                                                                                                                                                                                                                                                                                                                             |
| CpFeMn(CO) <sub>6</sub><br><b>6CO-4S</b> | 32.8 (A", 0.0)<br>41.1 (A", 0.3)<br>63.8 (A", 0.0)<br>65.5 (A', 1.9)<br>81.2 (A', 0.2)<br>81.8 (A", 0.5)<br>84.4 (A', 2.6)<br>92.8 (A', 0.6)<br>94.3 (A", 0.3)<br>110.3 (A', 1.1)<br>122.3 (A", 0.0)<br>135.7 (A", 0.1)<br>148.1 (A', 1.2)<br>173.4 (A', 1.2)<br>193.1 (A', 0.4)<br>354.2 (A', 4.3)<br>378.5 (A", 1.0)<br>402.2 (A', 1.2)<br>402.8 (A", 0.2)<br>407.6 (A', 12.1)<br>423.8 (A", 2.5)<br>433.3 (A', 6.5)<br>435.2 (A", 0.5)<br>487.4 (A", 14.3)<br>491.6 (A', 15.2)<br>494.9 (A', 65.8)<br>512.5 (A", 3.2)<br>519.7 (A', 48.2)<br>562.3 (A', 110.1)<br>576.3 (A", 21.7)<br>579.5 (A", 3.2)<br>586.6 (A', 38.5)<br>614.5 (A', 15.8)<br>615.6 (A", 1.5)<br>626.0 (A", 43.9)<br>627.2 (A', 19.4)<br>650.1 (A', 46.5)<br>702.8 (A', 97.3)<br>831.0 (A', 7.7) | 30.9 (A", 0.0)<br>45.0 (A", 0.2)<br>50.8 (A', 3.9)<br>57.0 (A", 0.0)<br>78.1 (A", 0.5)<br>79.5 (A', 0.5)<br>84.5 (A', 1.7)<br>89.7 (A", 0.0)<br>95.3 (A', 0.4)<br>104.4 (A", 0.1)<br>108.5 (A', 0.8)<br>135.6 (A", 0.1)<br>148.0 (A', 1.3)<br>166.3 (A', 1.9)<br>189.5 (A', 0.2)<br>325.7 (A', 6.2)<br>340.8 (A", 1.2)<br>378.8 (A', 0.6)<br>393.8 (A", 2.3)<br>402.8 (A', 16.2)<br>412.9 (A", 3.2)<br>428.9 (A", 0.9)<br>441.2 (A', 5.0)<br>463.9 (A", 13.2)<br>488.8 (A', 109.2)<br>504.9 (A', 12.6)<br>514.5 (A", 1.0)<br>523.4 (A', 19.0)<br>551.3 (A', 59.5)<br>563.3 (A", 1.8)<br>568.6 (A', 35.2)<br>573.4 (A", 14.0)<br>583.8 (A", 0.7)<br>590.2 (A', 30.6)<br>612.6 (A', 13.2)<br>620.3 (A", 42.7)<br>642.8 (A', 46.9)<br>695.3 (A', 98.3)<br>810.3 (A', 11.0) |

|                                          |                                                                                                                                                                                                                                                                                                                                                                                                                                                                                                                                                                 |                                                                                                                                                                                                                                                                                                                                                                                                                                                                                                                                                                 |
|------------------------------------------|-----------------------------------------------------------------------------------------------------------------------------------------------------------------------------------------------------------------------------------------------------------------------------------------------------------------------------------------------------------------------------------------------------------------------------------------------------------------------------------------------------------------------------------------------------------------|-----------------------------------------------------------------------------------------------------------------------------------------------------------------------------------------------------------------------------------------------------------------------------------------------------------------------------------------------------------------------------------------------------------------------------------------------------------------------------------------------------------------------------------------------------------------|
|                                          | 833.2 (A", 0.1)<br>843.1 (A', 2.5)<br>846.3 (A', 29.2)<br>881.3 (A", 4.3)<br>931.7 (A", 0.5)<br>931.8 (A', 5.5)<br>1028.0 (A", 4.5)<br>1039.0 (A', 3.5)<br>1082.0 (A', 1.5)<br>1083.6 (A", 0.1)<br>1151.5 (A', 2.5)<br>1277.3 (A", 0.0)<br>1407.6 (A', 3.8)<br>1409.1 (A", 0.0)<br>1455.0 (A", 3.9)<br>1472.6 (A', 1.0)<br>1991.0 (A", 446.4)<br>2005.6 (A', 877.6)<br>2013.6 (A', 97.8)<br>2039.4 (A", 1149.7)<br>2052.9 (A', 904.8)<br>2122.7 (A', 818.6)<br>3227.2 (A', 0.1)<br>3228.8 (A", 0.3)<br>3243.0 (A", 0.5)<br>3250.1 (A', 0.4)<br>3256.9 (A', 0.4) | 814.7 (A', 41.7)<br>818.3 (A", 0.0)<br>825.3 (A', 0.2)<br>860.6 (A", 3.6)<br>907.3 (A", 0.7)<br>908.4 (A', 5.1)<br>992.0 (A", 5.7)<br>1006.8 (A', 4.9)<br>1051.1 (A', 1.0)<br>1051.6 (A", 0.1)<br>1114.0 (A', 0.5)<br>1244.6 (A", 0.0)<br>1352.1 (A", 0.1)<br>1352.5 (A', 3.7)<br>1403.6 (A", 6.6)<br>1424.3 (A', 2.1)<br>1923.9 (A', 763.3)<br>1923.9 (A", 366.3)<br>1946.0 (A', 103.0)<br>1963.4 (A", 1074.4)<br>1976.6 (A', 867.2)<br>2043.5 (A', 752.4)<br>3152.9 (A', 0.1)<br>3155.0 (A", 0.1)<br>3168.0 (A", 0.0)<br>3173.1 (A', 0.4)<br>3181.0 (A', 0.2) |
| <b>CpFeMn(CO)<sub>6</sub><br/>6CO-5S</b> | 31.1 (A', 0.1)<br>36.4 (A", 0.2)<br>48.6 (A", 0.0)<br>72.1 (A", 0.1)<br>78.2 (A', 0.5)<br>82.3 (A", 0.4)<br>82.6 (A', 0.8)<br>87.1 (A', 1.2)<br>92.6 (A", 0.1)<br>98.3 (A', 0.0)<br>116.7 (A", 0.2)<br>125.8 (A', 0.2)<br>201.3 (A", 1.2)<br>226.6 (A', 0.2)<br>245.3 (A', 0.1)<br>315.6 (A", 0.7)<br>360.6 (A', 0.3)                                                                                                                                                                                                                                           | 24.3 (A", 0.1)<br>35.9 (A', 0.1)<br>50.0 (A", 0.0)<br>70.7 (A", 0.0)<br>82.1 (A', 2.0)<br>84.5 (A', 0.2)<br>84.6 (A", 0.5)<br>88.6 (A', 0.7)<br>98.9 (A", 0.1)<br>104.8 (A', 0.2)<br>128.9 (A", 0.0)<br>138.2 (A', 0.5)<br>225.9 (A', 0.6)<br>228.2 (A", 1.4)<br>235.8 (A', 0.0)<br>307.6 (A", 1.3)<br>340.8 (A", 9.0)                                                                                                                                                                                                                                          |

|                     |                     |
|---------------------|---------------------|
| 361.3 (A", 8.9)     | 346.8 (A', 2.1)     |
| 410.7 (A", 0.2)     | 380.1 (A', 1.1)     |
| 411.7 (A', 0.8)     | 401.3 (A", 0.0)     |
| 416.1 (A', 4.5)     | 422.0 (A', 7.1)     |
| 428.2 (A", 0.7)     | 434.9 (A", 0.1)     |
| 455.5 (A', 5.1)     | 445.2 (A', 4.4)     |
| 471.9 (A", 6.5)     | 464.3 (A", 5.2)     |
| 476.2 (A', 23.5)    | 483.0 (A', 17.0)    |
| 509.6 (A", 0.3)     | 496.7 (A", 0.8)     |
| 509.9 (A', 6.9)     | 510.3 (A', 2.7)     |
| 532.0 (A", 22.9)    | 528.6 (A", 9.5)     |
| 538.7 (A', 2.5)     | 532.6 (A', 2.4)     |
| 552.5 (A', 9.5)     | 550.1 (A', 15.1)    |
| 587.7 (A', 40.7)    | 576.2 (A", 3.2)     |
| 595.9 (A', 187.0)   | 580.7 (A', 3.8)     |
| 596.2 (A", 15.9)    | 584.2 (A", 17.1)    |
| 606.8 (A", 6.9)     | 590.2 (A', 45.5)    |
| 612.8 (A', 4.1)     | 601.3 (A', 105.9)   |
| 646.9 (A', 324.4)   | 644.0 (A", 39.6)    |
| 652.1 (A", 39.0)    | 647.0 (A', 343.1)   |
| 689.0 (A', 95.6)    | 685.9 (A', 114.3)   |
| 823.7 (A', 8.7)     | 811.1 (A', 25.7)    |
| 829.1 (A", 2.3)     | 818.1 (A", 3.1)     |
| 840.3 (A", 2.7)     | 820.3 (A", 2.2)     |
| 845.9 (A', 42.9)    | 825.1 (A', 30.6)    |
| 853.2 (A', 1.5)     | 843.8 (A', 4.6)     |
| 919.6 (A", 2.0)     | 899.5 (A", 1.5)     |
| 923.2 (A', 1.6)     | 903.9 (A', 0.5)     |
| 1010.3 (A', 5.4)    | 980.3 (A', 4.4)     |
| 1026.1 (A", 1.9)    | 1004.7 (A", 4.6)    |
| 1076.0 (A", 3.3)    | 1049.0 (A", 1.2)    |
| 1077.4 (A', 0.2)    | 1049.2 (A', 0.6)    |
| 1137.8 (A', 2.1)    | 1107.3 (A', 0.5)    |
| 1270.0 (A", 0.0)    | 1245.1 (A", 0.0)    |
| 1385.4 (A", 0.6)    | 1341.0 (A", 0.4)    |
| 1400.9 (A', 3.1)    | 1349.4 (A', 3.1)    |
| 1445.0 (A', 0.8)    | 1399.9 (A', 3.7)    |
| 1475.9 (A", 0.9)    | 1428.5 (A", 2.4)    |
| 1894.8 (A", 813.1)  | 1814.9 (A", 762.2)  |
| 1927.1 (A', 106.4)  | 1839.7 (A', 49.4)   |
| 2038.3 (A', 744.0)  | 1961.8 (A', 644.4)  |
| 2042.1 (A", 976.5)  | 1974.2 (A", 818.6)  |
| 2071.4 (A', 1401.3) | 1999.4 (A', 1225.4) |
| 2113.1 (A', 619.8)  | 2037.3 (A', 612.3)  |

|                                          |                                                                                                                                                                                                                                                                                                                                                                                                                                                                                                                                                                                                                                                                                                                                                                     |                                                                                                                                                                                                                                                                                                                                                                                                                                                                                                                                                                                                                                                                                                                              |
|------------------------------------------|---------------------------------------------------------------------------------------------------------------------------------------------------------------------------------------------------------------------------------------------------------------------------------------------------------------------------------------------------------------------------------------------------------------------------------------------------------------------------------------------------------------------------------------------------------------------------------------------------------------------------------------------------------------------------------------------------------------------------------------------------------------------|------------------------------------------------------------------------------------------------------------------------------------------------------------------------------------------------------------------------------------------------------------------------------------------------------------------------------------------------------------------------------------------------------------------------------------------------------------------------------------------------------------------------------------------------------------------------------------------------------------------------------------------------------------------------------------------------------------------------------|
|                                          | 3187.1 (A', 2.6)<br>3230.8 (A", 0.1)<br>3236.9 (A', 0.1)<br>3245.7 (A", 0.0)<br>3254.6 (A', 0.2)                                                                                                                                                                                                                                                                                                                                                                                                                                                                                                                                                                                                                                                                    | 3148.6 (A', 0.1)<br>3157.0 (A", 0.1)<br>3165.8 (A', 0.1)<br>3171.9 (A", 0.4)<br>3179.4 (A', 0.2)                                                                                                                                                                                                                                                                                                                                                                                                                                                                                                                                                                                                                             |
| CpFeMn(CO) <sub>5</sub><br><b>5CO-1S</b> | 29.5 (A", 0.0)<br>41.3 (A', 0.2)<br>47.6 (A", 0.2)<br>63.9 (A', 0.0)<br>80.6 (A", 0.9)<br>85.9 (A", 0.3)<br>97.0 (A', 0.3)<br>101.5 (A', 1.0)<br>136.5 (A", 0.0)<br>137.0 (A', 0.4)<br>196.3 (A', 0.6)<br>216.9 (A", 0.0)<br>239.3 (A', 0.7)<br>367.7 (A', 11.2)<br>379.7 (A", 0.0)<br>411.2 (A", 6.1)<br>411.5 (A', 9.4)<br>419.1 (A", 0.8)<br>432.2 (A', 16.5)<br>448.6 (A", 1.3)<br>460.1 (A', 41.5)<br>473.8 (A', 8.6)<br>476.3 (A", 1.9)<br>518.1 (A', 67.3)<br>530.4 (A', 6.8)<br>538.5 (A", 5.5)<br>551.7 (A", 9.8)<br>594.8 (A', 24.3)<br>598.7 (A", 5.4)<br>609.9 (A", 34.4)<br>612.5 (A', 9.3)<br>653.2 (A', 27.3)<br>681.3 (A', 67.9)<br>828.8 (A', 3.3)<br>833.8 (A", 0.0)<br>841.3 (A', 7.4)<br>845.8 (A', 16.7)<br>879.1 (A", 3.6)<br>922.0 (A', 1.4) | 14.1 (A, 0.0)<br>40.3 (A, 0.2)<br>44.9 (A, 0.3)<br>65.7 (A, 0.0)<br>80.4 (A, 0.9)<br>85.4 (A, 0.1)<br>99.7 (A, 0.5)<br>101.3 (A, 0.7)<br>132.2 (A, 0.5)<br>136.3 (A, 0.0)<br>190.4 (A, 0.9)<br>202.2 (A, 0.1)<br>235.9 (A, 1.1)<br>339.0 (A, 3.2)<br>350.0 (A, 0.6)<br>392.9 (A, 7.2)<br>398.4 (A, 6.7)<br>412.1 (A, 0.7)<br>423.2 (A, 22.7)<br>440.1 (A, 1.6)<br>452.7 (A, 57.9)<br>474.7 (A, 0.4)<br>476.1 (A, 1.3)<br>518.6 (A, 56.5)<br>526.0 (A, 2.3)<br>535.1 (A, 3.7)<br>544.1 (A, 9.7)<br>571.7 (A, 0.0)<br>582.0 (A, 18.4)<br>586.0 (A, 18.0)<br>605.1 (A, 33.2)<br>643.4 (A, 25.0)<br>673.8 (A, 52.7)<br>810.2 (A, 1.0)<br>813.5 (A, 38.0)<br>819.4 (A, 0.4)<br>822.5 (A, 1.6)<br>854.4 (A, 3.2)<br>894.0 (A, 0.9) |

|                                                |                                                                                                                                                                                                                                                                                                                                                                                                                                             |                                                                                                                                                                                                                                                                                                                                                                                                                                            |
|------------------------------------------------|---------------------------------------------------------------------------------------------------------------------------------------------------------------------------------------------------------------------------------------------------------------------------------------------------------------------------------------------------------------------------------------------------------------------------------------------|--------------------------------------------------------------------------------------------------------------------------------------------------------------------------------------------------------------------------------------------------------------------------------------------------------------------------------------------------------------------------------------------------------------------------------------------|
|                                                | 922.3 (A", 0.0)<br>1021.0 (A", 4.1)<br>1041.3 (A', 7.0)<br>1079.2 (A", 0.1)<br>1082.5 (A', 1.1)<br>1149.1 (A', 7.1)<br>1275.1 (A", 0.0)<br>1400.1 (A", 0.0)<br>1412.3 (A', 0.1)<br>1446.6 (A", 2.6)<br>1478.4 (A', 1.8)<br>1954.8 (A", 697.4)<br>1966.8 (A', 425.3)<br>2026.1 (A', 988.0)<br>2038.9 (A", 968.7)<br>2101.3 (A', 958.7)<br>3225.9 (A', 0.1)<br>3226.6 (A", 0.0)<br>3239.6 (A", 0.1)<br>3246.1 (A', 0.4)<br>3253.5 (A', 0.0)   | 897.1 (A, 0.3)<br>985.9 (A, 5.1)<br>1006.9 (A, 8.2)<br>1048.0 (A, 0.1)<br>1050.6 (A, 1.1)<br>1111.1 (A, 2.9)<br>1243.4 (A, 0.0)<br>1343.9 (A, 0.1)<br>1357.0 (A, 0.0)<br>1396.3 (A, 4.7)<br>1428.9 (A, 3.4)<br>1884.4 (A, 595.7)<br>1898.6 (A, 382.8)<br>1952.4 (A, 908.8)<br>1963.7 (A, 868.8)<br>2024.5 (A, 865.8)<br>3153.1 (A, 0.1)<br>3153.2 (A, 0.0)<br>3164.2 (A, 0.0)<br>3171.2 (A, 0.3)<br>3178.5 (A, 0.0)                        |
| <b>CpFeMn(CO)<sub>5</sub></b><br><b>5CO-2T</b> | 21.3 (A", 0.1)<br>24.7 (A', 0.3)<br>30.7 (A", 0.1)<br>77.3 (A', 0.3)<br>78.0 (A", 0.0)<br>87.9 (A", 0.3)<br>89.0 (A', 2.3)<br>97.6 (A', 0.1)<br>108.2 (A', 0.9)<br>131.3 (A", 0.7)<br>199.9 (A', 3.2)<br>226.4 (A", 2.3)<br>232.9 (A', 1.5)<br>288.9 (A", 4.8)<br>329.3 (A', 0.9)<br>362.3 (A', 6.2)<br>366.8 (A", 2.0)<br>409.6 (A", 0.1)<br>419.2 (A', 21.2)<br>425.1 (A", 0.0)<br>429.1 (A', 0.6)<br>466.3 (A', 15.0)<br>469.5 (A", 2.0) | 20.6 (A", 0.1)<br>23.5 (A', 0.5)<br>37.2 (A", 0.0)<br>78.1 (A", 0.0)<br>82.1 (A', 0.3)<br>87.3 (A", 0.1)<br>93.3 (A', 1.1)<br>98.7 (A', 0.9)<br>124.3 (A', 0.2)<br>138.1 (A", 0.2)<br>204.3 (A', 0.0)<br>237.3 (A', 0.5)<br>247.6 (A", 0.1)<br>313.8 (A", 4.8)<br>327.9 (A', 4.0)<br>351.5 (A', 1.1)<br>373.8 (A", 3.5)<br>401.9 (A", 1.3)<br>411.0 (A', 0.6)<br>420.8 (A", 0.0)<br>425.1 (A', 15.0)<br>463.9 (A", 0.6)<br>470.1 (A', 5.5) |

|                                                |                                                                                                                                                                                                                                                                                                                                                                                                                                                                                                                                                                                                                                                                                                                                                                    |                                                                                                                                                                                                                                                                                                                                                                                                                                                                                                                                                                                                                                                                                                                                                                |
|------------------------------------------------|--------------------------------------------------------------------------------------------------------------------------------------------------------------------------------------------------------------------------------------------------------------------------------------------------------------------------------------------------------------------------------------------------------------------------------------------------------------------------------------------------------------------------------------------------------------------------------------------------------------------------------------------------------------------------------------------------------------------------------------------------------------------|----------------------------------------------------------------------------------------------------------------------------------------------------------------------------------------------------------------------------------------------------------------------------------------------------------------------------------------------------------------------------------------------------------------------------------------------------------------------------------------------------------------------------------------------------------------------------------------------------------------------------------------------------------------------------------------------------------------------------------------------------------------|
|                                                | 478.3 (A", 5.7)<br>500.0 (A', 7.7)<br>518.2 (A', 1.2)<br>540.2 (A", 0.0)<br>554.7 (A', 25.8)<br>599.7 (A', 3.3)<br>600.7 (A", 0.7)<br>629.7 (A", 47.5)<br>634.0 (A', 33.4)<br>675.3 (A', 121.5)<br>816.5 (A', 36.9)<br>818.1 (A", 2.1)<br>830.4 (A', 20.9)<br>831.7 (A", 0.0)<br>837.5 (A', 8.7)<br>899.4 (A", 0.0)<br>911.1 (A', 0.1)<br>1027.9 (A', 11.8)<br>1033.2 (A", 7.2)<br>1076.3 (A', 2.0)<br>1078.1 (A", 0.4)<br>1147.2 (A', 4.8)<br>1275.7 (A", 0.0)<br>1388.2 (A', 9.1)<br>1393.8 (A", 0.1)<br>1461.8 (A', 2.1)<br>1463.0 (A", 0.9)<br>1908.1 (A", 908.4)<br>1914.2 (A', 135.1)<br>2031.7 (A', 943.5)<br>2054.2 (A", 815.7)<br>2106.2 (A', 1276.6)<br>3222.7 (A', 0.1)<br>3226.5 (A", 0.0)<br>3240.0 (A', 0.0)<br>3245.0 (A", 0.0)<br>3253.5 (A', 0.0) | 491.8 (A", 4.5)<br>512.5 (A", 0.0)<br>514.0 (A', 22.8)<br>519.1 (A', 0.7)<br>554.3 (A', 13.8)<br>568.1 (A", 1.0)<br>575.4 (A', 1.8)<br>613.5 (A", 42.1)<br>613.8 (A', 27.2)<br>659.4 (A', 94.2)<br>806.4 (A', 52.0)<br>812.9 (A", 0.9)<br>815.5 (A", 1.8)<br>821.5 (A', 4.7)<br>829.4 (A', 1.5)<br>889.7 (A', 0.6)<br>892.7 (A", 0.4)<br>996.0 (A', 9.6)<br>998.5 (A", 6.8)<br>1044.0 (A", 0.6)<br>1049.0 (A', 1.9)<br>1109.4 (A', 1.6)<br>1243.0 (A", 0.0)<br>1338.5 (A", 0.5)<br>1340.4 (A', 1.6)<br>1410.0 (A", 2.2)<br>1410.2 (A', 4.5)<br>1824.1 (A", 761.9)<br>1835.3 (A', 168.6)<br>1955.4 (A', 804.1)<br>1980.5 (A", 772.8)<br>2026.5 (A', 1215.0)<br>3145.7 (A', 0.2)<br>3155.8 (A", 0.0)<br>3165.6 (A', 0.0)<br>3169.5 (A", 0.3)<br>3178.3 (A', 0.1) |
| <b>CpFeMn(CO)<sub>5</sub></b><br><b>5CO-3S</b> | 35.7 (A, 0.2)<br>49.2 (A, 0.6)<br>61.1 (A, 0.1)<br>72.2 (A, 0.2)<br>76.8 (A, 1.0)<br>93.8 (A, 0.2)<br>98.6 (A, 0.3)                                                                                                                                                                                                                                                                                                                                                                                                                                                                                                                                                                                                                                                | 16.0 (A, 0.0)<br>24.5 (A, 0.2)<br>47.4 (A, 0.6)<br>69.6 (A, 0.4)<br>79.0 (A, 0.9)<br>87.3 (A, 0.9)<br>91.7 (A, 0.6)                                                                                                                                                                                                                                                                                                                                                                                                                                                                                                                                                                                                                                            |



|                   |                   |
|-------------------|-------------------|
| 100.9 (A, 0.9)    | 100.4 (A, 0.3)    |
| 104.8 (A, 0.6)    | 106.7 (A, 0.5)    |
| 119.7 (A, 0.9)    | 114.1 (A, 0.4)    |
| 126.7 (A, 1.2)    | 119.6 (A, 0.9)    |
| 191.0 (A, 3.6)    | 154.9 (A, 0.2)    |
| 283.7 (A, 3.2)    | 228.9 (A, 5.8)    |
| 363.4 (A, 2.7)    | 348.2 (A, 3.8)    |
| 395.7 (A, 3.3)    | 358.1 (A, 3.8)    |
| 406.5 (A, 2.2)    | 376.7 (A, 6.4)    |
| 429.4 (A, 1.2)    | 411.2 (A, 0.2)    |
| 438.9 (A, 10.7)   | 422.5 (A, 11.0)   |
| 447.8 (A, 0.2)    | 439.1 (A, 2.0)    |
| 474.9 (A, 5.6)    | 450.8 (A, 4.2)    |
| 490.9 (A, 6.4)    | 489.1 (A, 3.7)    |
| 508.8 (A, 5.5)    | 502.5 (A, 1.0)    |
| 534.9 (A, 14.8)   | 528.0 (A, 9.3)    |
| 539.3 (A, 7.9)    | 543.4 (A, 3.4)    |
| 548.6 (A, 3.3)    | 556.4 (A, 4.9)    |
| 598.5 (A, 82.4)   | 571.7 (A, 68.1)   |
| 604.8 (A, 4.2)    | 585.7 (A, 6.0)    |
| 612.9 (A, 8.0)    | 587.3 (A, 68.2)   |
| 628.0 (A, 28.4)   | 621.1 (A, 27.5)   |
| 639.3 (A, 42.5)   | 627.9 (A, 42.9)   |
| 648.0 (A, 28.5)   | 645.1 (A, 42.5)   |
| 676.7 (A, 113.6)  | 649.8 (A, 12.4)   |
| 716.4 (A, 53.0)   | 707.1 (A, 82.9)   |
| 835.8 (A, 1.8)    | 813.6 (A, 27.8)   |
| 837.2 (A, 5.6)    | 821.2 (A, 0.4)    |
| 848.0 (A, 17.4)   | 824.0 (A, 22.4)   |
| 861.4 (A, 21.2)   | 826.1 (A, 1.5)    |
| 866.4 (A, 8.4)    | 847.6 (A, 6.3)    |
| 915.7 (A, 1.3)    | 895.0 (A, 2.6)    |
| 934.4 (A, 1.3)    | 901.5 (A, 0.2)    |
| 1020.9 (A, 4.0)   | 985.2 (A, 5.4)    |
| 1041.0 (A, 3.1)   | 1005.1 (A, 4.8)   |
| 1080.5 (A, 0.7)   | 1049.1 (A, 0.8)   |
| 1081.8 (A, 1.2)   | 1049.6 (A, 0.3)   |
| 1146.3 (A, 4.0)   | 1109.0 (A, 1.3)   |
| 1276.0 (A, 0.0)   | 1242.8 (A, 0.0)   |
| 1401.9 (A, 0.6)   | 1346.0 (A, 0.7)   |
| 1407.3 (A, 0.5)   | 1352.2 (A, 0.2)   |
| 1450.0 (A, 1.5)   | 1398.1 (A, 4.5)   |
| 1472.6 (A, 2.1)   | 1421.6 (A, 3.3)   |
| 1780.0 (A, 325.3) | 1774.6 (A, 295.5) |

|                                                |                                                                                                                                                                                                                                                                                                                                                                                                                                                                                                                                                                                                                                                       |                                                                                                                                                                                                                                                                                                                                                                                                                                                                                                                                                                                                                                                    |
|------------------------------------------------|-------------------------------------------------------------------------------------------------------------------------------------------------------------------------------------------------------------------------------------------------------------------------------------------------------------------------------------------------------------------------------------------------------------------------------------------------------------------------------------------------------------------------------------------------------------------------------------------------------------------------------------------------------|----------------------------------------------------------------------------------------------------------------------------------------------------------------------------------------------------------------------------------------------------------------------------------------------------------------------------------------------------------------------------------------------------------------------------------------------------------------------------------------------------------------------------------------------------------------------------------------------------------------------------------------------------|
|                                                | 1998.6 (A, 604.0)<br>2018.0 (A, 829.8)<br>2046.1 (A, 1105.7)<br>2091.8 (A, 727.6)<br>3229.6 (A, 0.1)<br>3230.3 (A, 0.0)<br>3243.8 (A, 0.6)<br>3246.5 (A, 0.8)<br>3255.3 (A, 0.4)                                                                                                                                                                                                                                                                                                                                                                                                                                                                      | 1925.6 (A, 642.8)<br>1941.1 (A, 710.7)<br>1974.7 (A, 971.1)<br>2012.3 (A, 638.4)<br>3154.8 (A, 0.1)<br>3158.0 (A, 0.1)<br>3169.1 (A, 0.0)<br>3172.9 (A, 0.3)<br>3181.5 (A, 0.3)                                                                                                                                                                                                                                                                                                                                                                                                                                                                    |
| <b>CpFeMn(CO)<sub>5</sub></b><br><b>5CO-4S</b> | 26.4 (A, 0.2)<br>40.5 (A, 0.2)<br>47.2 (A, 0.5)<br>60.7 (A, 0.9)<br>76.6 (A, 0.3)<br>80.6 (A, 0.4)<br>84.8 (A, 0.3)<br>92.8 (A, 0.4)<br>103.2 (A, 0.1)<br>124.6 (A, 0.7)<br>167.0 (A, 0.2)<br>217.5 (A, 0.9)<br>252.7 (A, 1.4)<br>366.7 (A, 0.4)<br>379.0 (A, 3.4)<br>382.2 (A, 2.1)<br>407.3 (A, 1.6)<br>420.3 (A, 0.5)<br>441.8 (A, 3.5)<br>452.2 (A, 3.7)<br>476.7 (A, 3.9)<br>485.9 (A, 0.9)<br>512.6 (A, 28.9)<br>524.5 (A, 26.9)<br>530.8 (A, 0.5)<br>558.1 (A, 24.9)<br>565.5 (A, 17.1)<br>598.8 (A, 4.3)<br>607.1 (A, 35.0)<br>613.0 (A, 10.9)<br>622.9 (A, 84.0)<br>691.9 (A, 132.0)<br>702.9 (A, 35.2)<br>825.5 (A, 11.1)<br>829.5 (A, 1.9) | 22.2 (A, 0.1)<br>31.4 (A, 0.2)<br>42.2 (A, 0.5)<br>49.0 (A, 0.6)<br>68.2 (A, 0.2)<br>79.1 (A, 0.2)<br>84.3 (A, 0.6)<br>94.6 (A, 0.5)<br>104.4 (A, 0.2)<br>118.6 (A, 0.4)<br>163.5 (A, 0.3)<br>204.6 (A, 0.9)<br>232.3 (A, 2.7)<br>346.9 (A, 2.8)<br>357.6 (A, 5.1)<br>366.8 (A, 1.5)<br>387.1 (A, 1.6)<br>416.4 (A, 0.1)<br>437.3 (A, 4.0)<br>453.6 (A, 5.3)<br>478.8 (A, 8.0)<br>484.4 (A, 0.7)<br>515.2 (A, 24.2)<br>518.6 (A, 5.7)<br>527.8 (A, 8.5)<br>547.3 (A, 23.3)<br>560.4 (A, 6.3)<br>570.9 (A, 2.8)<br>582.0 (A, 6.0)<br>606.8 (A, 99.1)<br>608.7 (A, 53.1)<br>684.0 (A, 115.3)<br>699.4 (A, 26.0)<br>804.3 (A, 32.0)<br>814.1 (A, 4.4) |

|                    |                    |
|--------------------|--------------------|
| 836.1 (A, 9.5)     | 816.4 (A, 9.0)     |
| 839.5 (A, 16.0)    | 821.3 (A, 5.4)     |
| 869.1 (A, 9.3)     | 848.0 (A, 6.8)     |
| 908.1 (A, 1.4)     | 887.4 (A, 1.0)     |
| 918.7 (A, 0.9)     | 894.2 (A, 0.2)     |
| 1016.2 (A, 6.3)    | 980.1 (A, 6.5)     |
| 1038.7 (A, 3.4)    | 1005.1 (A, 4.9)    |
| 1077.4 (A, 0.6)    | 1046.4 (A, 0.7)    |
| 1080.0 (A, 1.1)    | 1049.0 (A, 0.8)    |
| 1144.8 (A, 4.6)    | 1106.3 (A, 2.1)    |
| 1273.5 (A, 0.0)    | 1242.0 (A, 0.0)    |
| 1396.6 (A, 1.3)    | 1341.5 (A, 1.1)    |
| 1405.6 (A, 0.7)    | 1350.2 (A, 0.2)    |
| 1445.1 (A, 1.8)    | 1393.1 (A, 4.1)    |
| 1477.1 (A, 1.3)    | 1425.9 (A, 2.5)    |
| 1800.3 (A, 499.2)  | 1735.5 (A, 461.8)  |
| 2010.8 (A, 321.0)  | 1941.1 (A, 379.4)  |
| 2020.1 (A, 651.5)  | 1947.2 (A, 831.6)  |
| 2029.1 (A, 1461.5) | 1963.0 (A, 1124.9) |
| 2091.3 (A, 780.0)  | 2016.1 (A, 666.2)  |
| 3225.7 (A, 0.0)    | 3150.3 (A, 0.0)    |
| 3228.8 (A, 0.0)    | 3156.5 (A, 0.0)    |
| 3240.4 (A, 0.2)    | 3164.3 (A, 0.0)    |
| 3245.6 (A, 0.3)    | 3171.1 (A, 0.2)    |
| 3253.5 (A, 0.2)    | 3180.3 (A, 0.2)    |

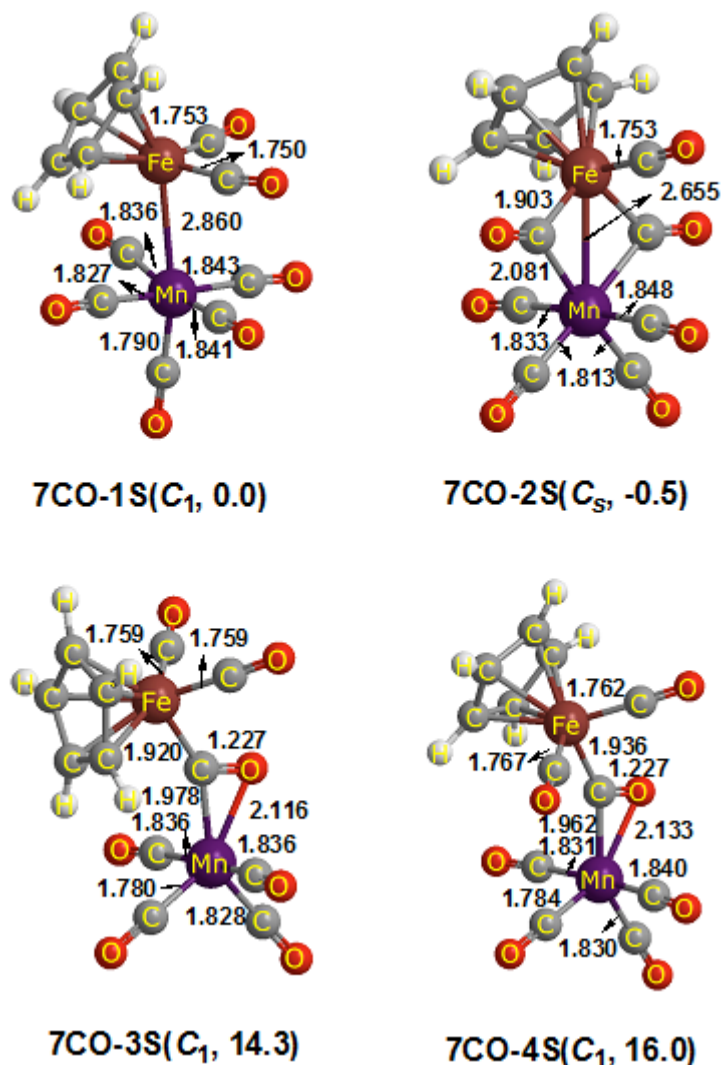

**Figure S1.** Four optimized geometries (bond lengths in Å) for  $\text{CpFeMn(CO)}_7$  at the BP86 level of theory. The numbers in parentheses are the relative energies ( $\Delta E$  in  $\text{kcal}\cdot\text{mol}^{-1}$ ). The subsequent figures have the same arrangement.

**Table S15** The total energies ( $E$ , in Hartree), relative energies ( $\Delta E$ , in  $\text{kcal}\cdot\text{mol}^{-1}$ ), Fe-Mn bond distances (Å), the number of imaginary vibrational frequencies ( $N_{\text{imag}}$ ) and spin expectation values ( $\langle S^2 \rangle$ ) for the  $\text{CpFeMn(CO)}_7$  structures.

| Structures       | $E$          | $\Delta E$ | Fe-Mn | $N_{\text{imag}}$ | $\langle S^2 \rangle$ |
|------------------|--------------|------------|-------|-------------------|-----------------------|
| 7CO-1S ( $C_1$ ) | -3402.433502 | 0.0        | 2.860 | 0                 | 0.00                  |
| 7CO-2S ( $C_s$ ) | -3402.434350 | -0.5       | 2.655 | 0                 | 0.00                  |
| 7CO-3S ( $C_1$ ) | -3402.410767 | 14.3       | 3.763 | 0                 | 0.00                  |
| 7CO-4S ( $C_1$ ) | -3402.407940 | 16.0       | 3.782 | 0                 | 0.00                  |

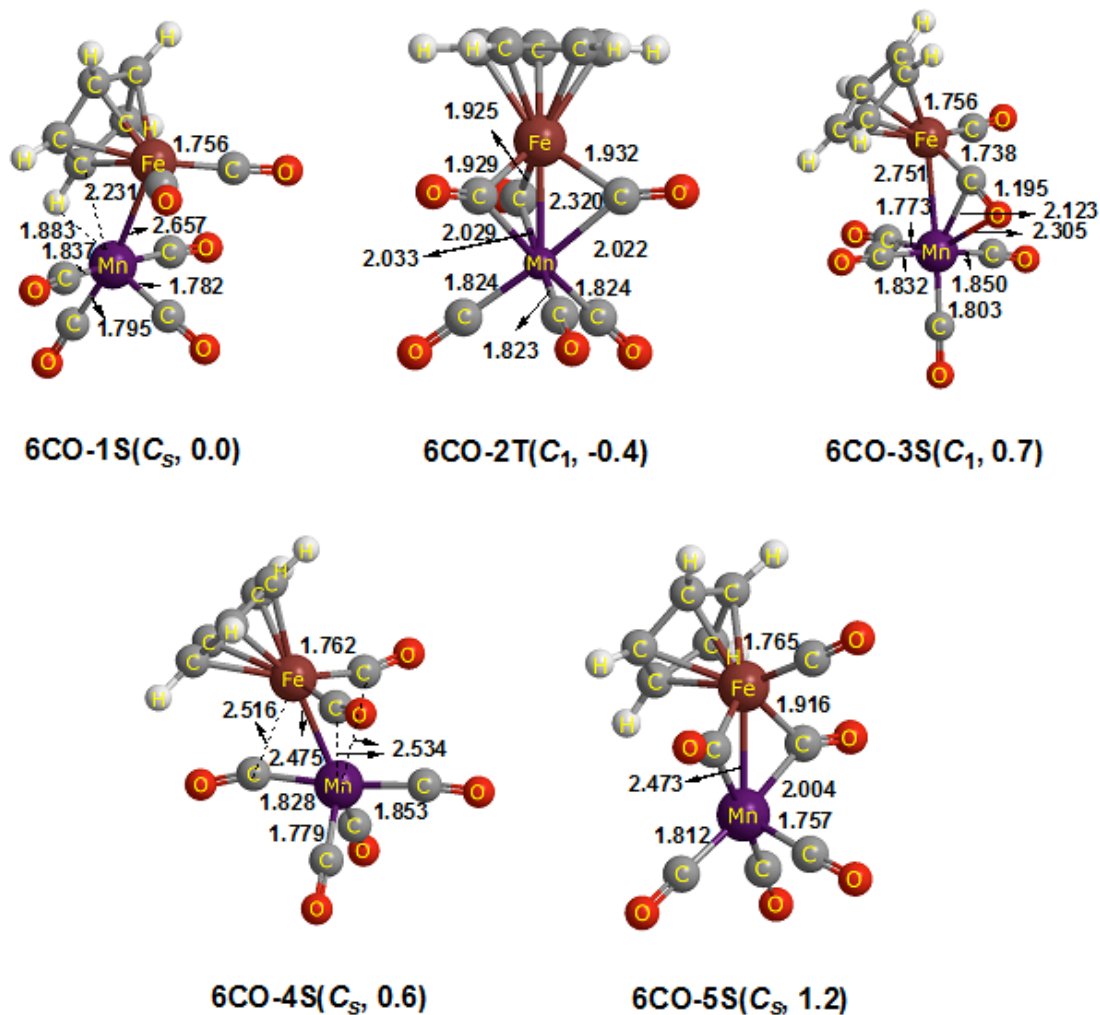

**Figure S2.** Optimized geometries for the five CpFeMn(CO)<sub>6</sub> structures at the BP86 level of theory.

**Table S16** The total energies ( $E$ , in Hartree), relative energies ( $\Delta E$ , in kcal·mol<sup>-1</sup>), Fe-Mn bond distances (Å), the number of imaginary vibrational frequencies ( $N_{\text{imag}}$ ) and spin expectation values ( $\langle S^2 \rangle$ ) for the CpFeMn(CO)<sub>6</sub> structures.

| Structures       | $E$          | $\Delta E$ | Fe-Mn | $N_{\text{imag}}$ | $\langle S^2 \rangle$ |
|------------------|--------------|------------|-------|-------------------|-----------------------|
| 6CO-1S ( $C_s$ ) | -3289.032220 | 0.0        | 2.657 | 0                 | 0.00                  |
| 6CO-2T ( $C_1$ ) | -3289.032806 | -0.4       | 2.320 | 0                 | 2.03                  |
| 6CO-3S ( $C_1$ ) | -3289.031110 | 0.7        | 2.751 | 0                 | 0.00                  |
| 6CO-4S ( $C_s$ ) | -3289.031230 | 0.6        | 2.475 | 0                 | 0.00                  |
| 6CO-5S ( $C_s$ ) | -3289.030379 | 1.2        | 2.473 | 0                 | 0.00                  |

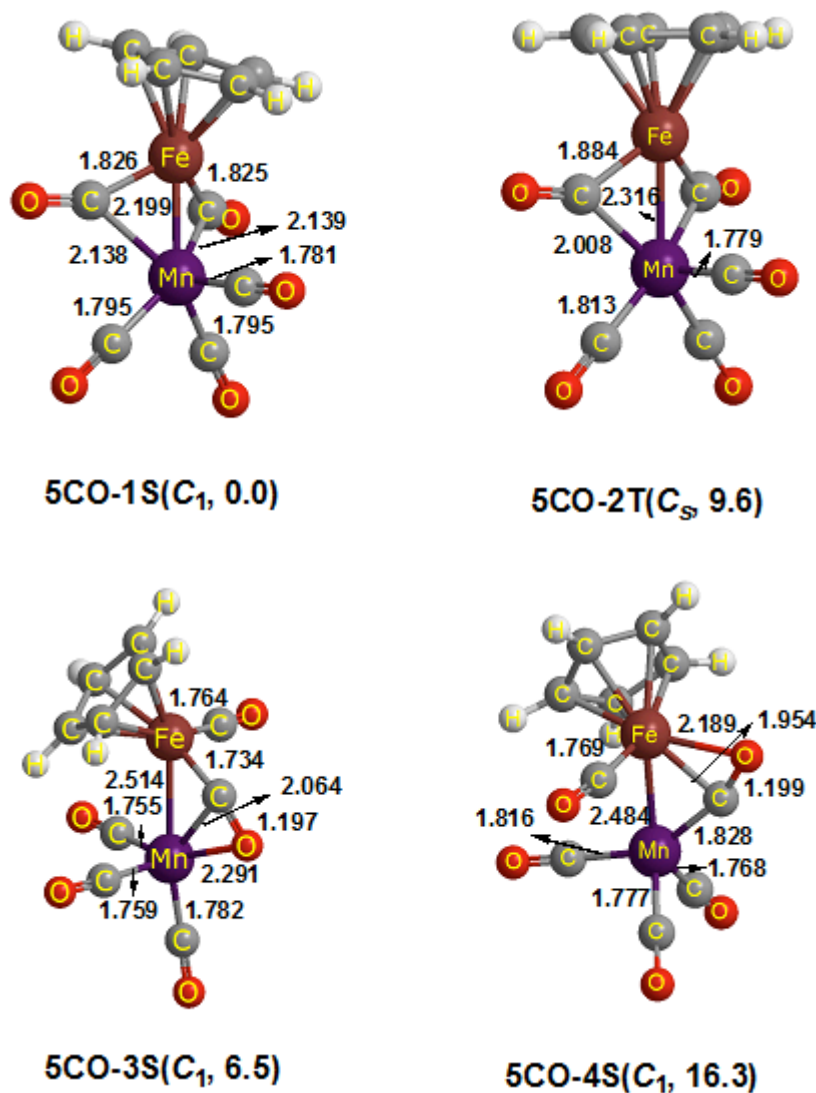

**Figure S3.** Four optimized structures for the  $\text{CpFeMn}(\text{CO})_5$  structure at the BP86 level of theory.

**Table S17** The total energies ( $E$ , in Hartree), relative energies ( $\Delta E$ , in  $\text{kcal}\cdot\text{mol}^{-1}$ ), Fe-Mn bond distances ( $\text{\AA}$ ), the number of imaginary vibrational frequencies ( $N_{\text{imag}}$ ) and spin expectation values  $\langle S^2 \rangle$  for the  $\text{CpFeMn}(\text{CO})_5$  structures

| Structures       | $E$          | $\Delta E$ | Fe-Mn | $N_{\text{imag}}$ | $\langle S^2 \rangle$ |
|------------------|--------------|------------|-------|-------------------|-----------------------|
| 5CO-1S ( $C_1$ ) | -3175.640899 | 0.0        | 2.199 | 0                 | 0.00                  |
| 5CO-2T ( $C_s$ ) | -3175.625594 | 9.6        | 2.316 | 0                 | 2.03                  |
| 5CO-3S ( $C_1$ ) | -3175.630508 | 6.5        | 2.514 | 0                 | 0.00                  |
| 5CO-4S ( $C_1$ ) | -3175.614982 | 16.3       | 2.484 | 0                 | 0.00                  |

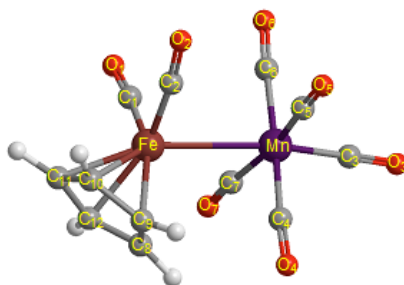

**CpFe(CO)<sub>2</sub>Mn(CO)<sub>5</sub>**

**Figure S4.** The structure of CpFe(CO)<sub>2</sub>Mn(CO)<sub>5</sub>.

**Table S18** Comparison of theoretical intramolecular distances (in Å ) and angles (deg) of CpFe(CO)<sub>2</sub>Mn(CO)<sub>5</sub> with the experimental X-ray structural data (ref. 24).

| 7CO-1S                              | M06-L | BP86  | Exp <sup>22</sup>                   |
|-------------------------------------|-------|-------|-------------------------------------|
| Fe-Mn                               | 2.843 | 2.860 | 2.840, 2.845 with the average 2.843 |
| Fe-C(1)                             | 1.759 | 1.753 | 1.676, 1.726                        |
| Fe-C(2)                             | 1.759 | 1.750 | 1.754, 1.709                        |
| Fe-C average                        | 1.759 | 1.752 | the average 1.716                   |
| Mn-C(3)                             | 1.793 | 1.790 | 1.748, 1.750                        |
| Mn-C <sub>axial carbonyl</sub>      | 1.793 | 1.790 | with the average 1.749              |
| Mn-C(4)                             | 1.826 | 1.827 | 1.841, 1.815                        |
| Mn-C(5)                             | 1.840 | 1.841 | 1.809, 1.819                        |
| Mn-C(6)                             | 1.851 | 1.843 | 1.823, 1.833                        |
| Mn-C(7)                             | 1.840 | 1.836 | 1.827, 1.833                        |
| Mn-C <sub>equatorial carbonyl</sub> | 1.839 | 1.837 | the average 1.825                   |
| C(1)-O(1)                           | 1.150 | 1.161 | 1.217, 1.158                        |
| C(2)-O(2)                           | 1.150 | 1.163 | 1.129, 1.170                        |
| C-O (Fe)                            | 1.150 | 1.162 | the average 1.169                   |
| C(3)-O(3)                           | 1.148 | 1.159 | 1.194, 1.195                        |
| C-O (Mn, axial)                     | 1.148 | 1.159 | the average 1.195                   |
| C(4)-O(4)                           | 1.148 | 1.158 | 1.146, 1.159                        |
| C(5)-O(5)                           | 1.147 | 1.154 | 1.148, 1.160                        |
| C(6)-O(6)                           | 1.144 | 1.153 | 1.152, 1.153                        |
| C(7)-O(7)                           | 1.147 | 1.159 | 1.180, 1.150                        |
| C-O (Mn, equatorial)                | 1.147 | 1.156 | the average 1.156                   |
| Fe-C(1)-O(1)                        | 176.8 | 175.0 | 169.5, 173.5                        |
| Fe-C(2)-O(2)                        | 176.8 | 173.4 | 173.1, 173.9                        |
| Mn-C(3)-O(3)                        | 179.9 | 179.0 | 177.9, 178.6                        |
| Mn-C(4)-O(4)                        | 178.7 | 176.4 | 177.1, 178.6                        |
| Mn-C(5)-O(5)                        | 177.1 | 177.3 | 177.8, 177.6                        |
| Mn-C(6)-O(6)                        | 179.2 | 176.9 | 179.6, 177.2                        |
| Mn-C(7)-O(7)                        | 177.1 | 174.5 | 178.5, 179.1                        |

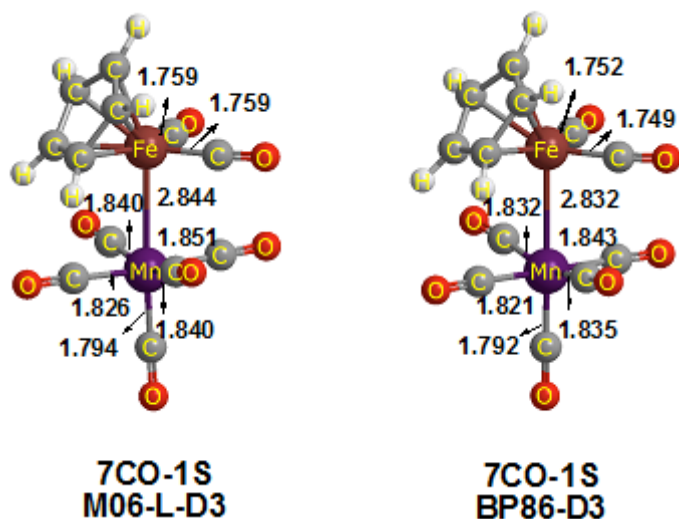

**Figure S5.** Optimized geometries (bond lengths in Å) for the experimentally known heterobimetallic compound  $\text{CpFeMn}(\text{CO})_7$  at the M06-L and BP86 level of theory using the the empirical dispersion correction by Grimme's DFT-D3 method.

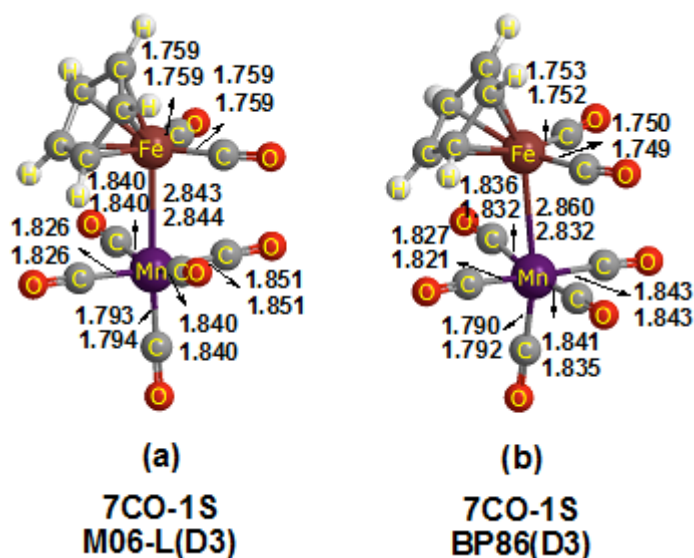

**Figure S6.** Optimized geometries (bond lengths in Å) for the experimentally known heterobimetallic compound  $\text{CpFeMn}(\text{CO})_7$  using the DFT methods: (a) M06-L (up) and M06-L-D3 (below), (b) BP86 (up) and BP86-D3 (below).

For presenting clearly the bond distances (in Å) with and without considering the dispersion effects are shown in Figure S6. It indicates that the results optimized by the M06-L method are in excellent agreement with those obtained by the M06-L-D3 method. Thus the difference between the Fe-Mn bond length with and without dispersion is only 0.001 Å. However, the difference between the BP86 and BP86-D3 results is larger than that in M06-L and M06-L-D3, especially the difference in the Fe-Mn bond length of 0.028 Å between the BP86 and BP86-D3 methods. This



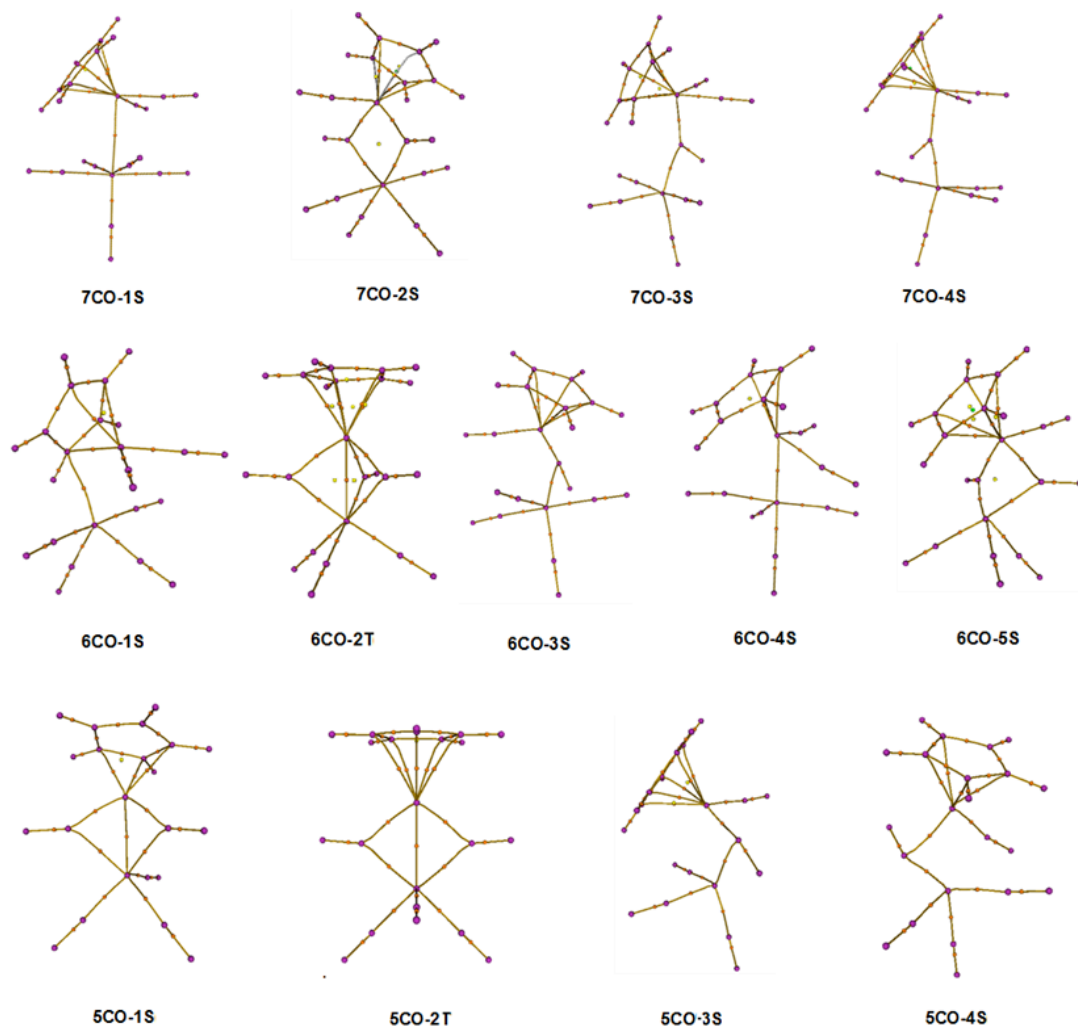

**Figure S7.** Bond paths for optimized  $\text{CpFeMn}(\text{CO})_n$  ( $n = 7, 6, 5$ ) structures at the M06-L level of theory. Red dots are bond critical points, yellow dots are ring critical points, and green dots are cage critical points.

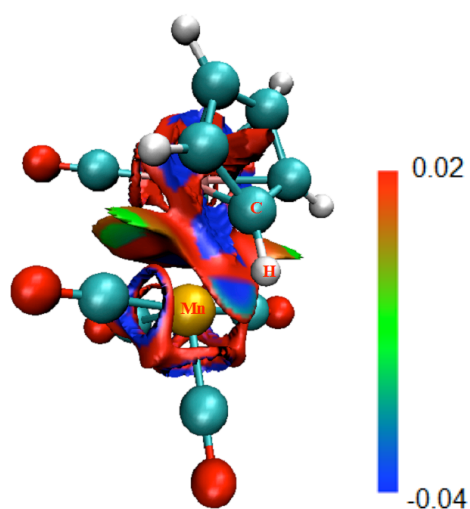

**Figure S8.** NCI isosurfaces of **6CO-1S** at the M06-L level of theory. The cutoff value is 0.09 au. The surfaces describe the reduced density gradient at an isovalue of 0.4 au. The surfaces are colored on a blue-green-red scale ranging from -0.04 to +0.02 au.

**Table S19** Topological data at the bond critical point for Mn-C<sub>cp</sub> segment in **6CO-1S** at the M06-L level of theory. All values are in au.

| Structures              | $\rho_h$ | $\nabla^2\rho_h$ | $G_h$ | $V_h$  | $H_h$  | $G_h/\rho_h$ |
|-------------------------|----------|------------------|-------|--------|--------|--------------|
| <b>6CO-1S</b> ( $C_s$ ) | 0.056    | 0.133            | 0.048 | -0.063 | -0.015 | 0.857        |

**Table S20.** Wiberg Bond Indices (WBI) of the Fe-Mn, Fe-Mn bond lengths and the natural charges on the Fe and Mn atoms in the CpFeMn(CO)<sub>n</sub> (*n* = 7, 6, 5) structures from NBO analysis using the BP86 method.

| Structures<br>(symmetry)                | Fe-Mn<br>WBI | formal<br>bond<br>order | Fe-Mn<br>distance,<br>Å | Bridging<br>groups   | Natural charges |       |
|-----------------------------------------|--------------|-------------------------|-------------------------|----------------------|-----------------|-------|
|                                         |              |                         |                         |                      | Fe              | Mn    |
| <b>7CO-1S</b> ( <i>C</i> <sub>1</sub> ) | 0.34         | 1                       | 2.860                   | none                 | -0.37           | -1.15 |
| <b>7CO-2S</b> ( <i>C</i> <sub>s</sub> ) | 0.28         | 1                       | 2.655                   | 2 μ-CO               | -0.42           | -1.15 |
| <b>7CO-3S</b> ( <i>C</i> <sub>1</sub> ) | 0.12         | 0                       | 3.763                   | η <sup>2</sup> -μ-CO | -0.54           | -0.83 |
| <b>7CO-4S</b> ( <i>C</i> <sub>1</sub> ) | 0.12         | 0                       | 3.782                   | η <sup>2</sup> -μ-CO | -0.55           | -0.83 |
| <b>6CO-1S</b> ( <i>C</i> <sub>s</sub> ) | 0.42         | 1                       | 2.657                   | Mn-H-C               | -0.45           | -0.82 |
| <b>6CO-2T</b> ( <i>C</i> <sub>1</sub> ) | 0.32         | 2                       | 2.320                   | 3 μ-CO               | -0.10           | -1.03 |
| <b>6CO-3S</b> ( <i>C</i> <sub>1</sub> ) | 0.36         | 1                       | 2.751                   | η <sup>2</sup> -μ-CO | -0.35           | -0.76 |
| <b>6CO-4S</b> ( <i>C</i> <sub>s</sub> ) | 0.52         | 2                       | 2.475                   | none                 | -0.35           | -0.70 |
| <b>6CO-5S</b> ( <i>C</i> <sub>s</sub> ) | 0.40         | 1                       | 2.473                   | 2 μ-CO               | -0.45           | -0.59 |
| <b>5CO-1S</b> ( <i>C</i> <sub>1</sub> ) | 0.82         | 3                       | 2.199                   | 2 μ-CO               | -0.21           | -0.61 |
| <b>5CO-2T</b> ( <i>C</i> <sub>s</sub> ) | 0.57         | 2                       | 2.316                   | 2 μ-CO               | 0.19            | -0.73 |
| <b>5CO-3S</b> ( <i>C</i> <sub>1</sub> ) | 0.49         | 2                       | 2.514                   | η <sup>2</sup> -μ-CO | -0.40           | -0.27 |
| <b>5CO-4S</b> ( <i>C</i> <sub>1</sub> ) | 0.54         | 2                       | 2.484                   | η <sup>2</sup> -μ-CO | -0.14           | -0.57 |

**Table S21** The ADCH atomic charges on the Fe and Mn atoms in the CpFeMn(CO)<sub>n</sub> (*n* = 7, 6, 5) structures at the M06-L level of theory.

| Structures<br>(symmetry)                | ADCH charges |        |
|-----------------------------------------|--------------|--------|
|                                         | Fe           | Mn     |
| <b>7CO-1S</b> ( <i>C</i> <sub>1</sub> ) | -0.205       | -0.171 |
| <b>7CO-2S</b> ( <i>C</i> <sub>s</sub> ) | -0.169       | -0.130 |
| <b>7CO-3S</b> ( <i>C</i> <sub>1</sub> ) | -0.166       | -0.099 |
| <b>7CO-4S</b> ( <i>C</i> <sub>1</sub> ) | -0.154       | -0.085 |
| <b>6CO-1S</b> ( <i>C</i> <sub>s</sub> ) | -0.252       | -0.077 |
| <b>6CO-2T</b> ( <i>C</i> <sub>1</sub> ) | -0.101       | -0.108 |
| <b>6CO-3S</b> ( <i>C</i> <sub>1</sub> ) | -0.208       | -0.098 |
| <b>6CO-4S</b> ( <i>C</i> <sub>s</sub> ) | -0.200       | -0.098 |
| <b>6CO-5S</b> ( <i>C</i> <sub>s</sub> ) | -0.180       | -0.012 |
| <b>5CO-1S</b> ( <i>C</i> <sub>1</sub> ) | -0.188       | -0.091 |
| <b>5CO-2T</b> ( <i>C</i> <sub>s</sub> ) | 0.001        | -0.092 |
| <b>5CO-3S</b> ( <i>C</i> <sub>1</sub> ) | -0.209       | 0.067  |
| <b>5CO-4S</b> ( <i>C</i> <sub>1</sub> ) | -0.170       | -0.118 |

**Table S22** The CDA results of the  $\text{CpFeMn}(\text{CO})_n$  ( $n = 7, 6, 5$ ) structures at the M06-L/DZP level of theory: calculated donation  $d(\text{A}\rightarrow\text{B})$ , back-donation  $b(\text{A}\leftarrow\text{B})$ , repulsive polarization  $r(\text{A}\leftrightarrow\text{B})$ , and the donation/back-donation ( $d/b$ ) ratio.

|                                 | A-B                                                                              | $d$   | $b$   | $d-b$  | $r$    | $d/b$ |
|---------------------------------|----------------------------------------------------------------------------------|-------|-------|--------|--------|-------|
| <b>7CO-1S</b>                   | $\text{CO-CpFe}(\text{CO})_2\text{Mn}(\text{CO})_4$                              | 0.189 | 0.114 | 0.075  | -0.360 | 1.66  |
| <b>7CO-2S</b>                   | $\text{CO-CpFe}(\text{CO})(\mu\text{-CO})_2\text{Mn}(\text{CO})_3$               | 0.164 | 0.113 | 0.051  | -0.420 | 1.45  |
| <b>7CO-3S</b>                   | $\text{CO-CpFe}(\text{CO})_2(\eta^2\text{-}\mu\text{-CO})\text{Mn}(\text{CO})_3$ | 0.154 | 0.103 | 0.051  | -0.308 | 1.50  |
| <b>7CO-4S</b>                   | $\text{CO-CpFe}(\text{CO})_2(\eta^2\text{-}\mu\text{-CO})\text{Mn}(\text{CO})_3$ | 0.187 | 0.137 | 0.050  | -0.412 | 1.36  |
| <b>6CO-1S</b>                   | $\text{CO-CpFe}(\text{CO})_2\text{Mn}(\text{CO})_3$                              | 0.172 | 0.130 | 0.042  | -0.402 | 1.32  |
| <b>6CO-2T</b>                   | $\text{CO-CpFe}(\mu\text{-CO})_3\text{Mn}(\text{CO})_2$                          | 0.141 | 0.103 | 0.038  | -0.350 | 1.37  |
| <b>6CO-3S</b>                   | $\text{CO-CpFe}(\text{CO})(\eta^2\text{-}\mu\text{-CO})\text{Mn}(\text{CO})_3$   | 0.179 | 0.115 | 0.064  | -0.364 | 1.56  |
| <b>6CO-4S</b>                   | $\text{CO-CpFe}(\text{CO})_2\text{Mn}(\text{CO})_3$                              | 0.152 | 0.127 | 0.025  | -0.383 | 1.20  |
| <b>6CO-5S</b>                   | $\text{CO-CpFe}(\text{CO})(\mu\text{-CO})_2\text{Mn}(\text{CO})_2$               | 0.137 | 0.117 | 0.020  | -0.434 | 1.17  |
| <b>5CO-1S</b>                   | $\text{CO-CpFe}(\mu\text{-CO})_2\text{Mn}(\text{CO})_2$                          | 0.141 | 0.131 | 0.010  | -0.414 | 1.08  |
| <b>5CO-2T</b>                   | $\text{CO-CpFe}(\mu\text{-CO})_2\text{Mn}(\text{CO})_2$                          | 0.104 | 0.113 | -0.009 | -0.322 | 0.92  |
| <b>5CO-3S</b>                   | $\text{CO-CpFe}(\text{CO})(\eta^2\text{-}\mu\text{-CO})\text{Mn}(\text{CO})_2$   | 0.160 | 0.105 | 0.055  | -0.352 | 1.52  |
| <b>5CO-4S</b>                   | $\text{CO-CpFe}(\text{CO})(\eta^2\text{-}\mu\text{-CO})\text{Mn}(\text{CO})_2$   | 0.140 | 0.120 | 0.020  | -0.354 | 1.17  |
| <b>Ni(CO)<sub>4</sub> (DZP)</b> | $\text{CO-Ni}(\text{CO})_3$                                                      | 0.218 | 0.155 | 0.063  | -0.123 | 1.41  |
| <b>Ni(CO)<sub>4</sub> (TZP)</b> | $\text{CO-Ni}(\text{CO})_3$                                                      | 0.126 | 0.179 | -0.053 | -0.120 | 0.70  |

However, as has recently been demonstrated<sup>1,2</sup> that the charge decomposition analysis (CDA) could give reasonable estimates of donation and back-donation between the metal fragment and the ligand fragment if their electronic polarization is sufficiently small or absent. And, we also calculated the donation and  $\pi$ -back-donation of  $\text{Ni}(\text{CO})_4$  using the M06-L method with DZP and TZP basis sets, respectively. The results show that the amount of  $\text{CO}\rightarrow\text{Ni}$  donation is greater than that of the  $\text{Mn}\rightarrow\text{CO}$  back-donation with DZP basis set which consisting with the previous report<sup>3</sup>, while the result of TZP is opposite. Thus, the CDA for the  $\text{CpFeMn}(\text{CO})_n$  ( $n = 7, 6, 5$ ) structures are calculated at the M06-L/DZP level of theory.

The CDA results given in Table S22 show the amount of  $\text{CO}\rightarrow\text{Mn}$  charge donation ( $d$ ),  $\text{Mn}\rightarrow\text{CO}$  back-donation ( $b$ ), the  $\text{CO}\leftrightarrow\text{Mn}$  repulsive polarization ( $r$ ) and the donation/back-donation ratio ( $d/b$ ). The CDA results show that the  $\text{CO}\rightarrow\text{Mn}$   $\sigma$  forward bonding is stronger than the concurrent  $\text{Mn}\rightarrow\text{CO}$  back-bonding, corresponding to the observation of the nature charge on Mn atom. This term  $r$  is negative, because electronic charge is depleted from the overlapping area of the occupied orbitals, thus reflecting an electron repulsive effect.

The CDA results for the structures of 7CO-1S and 6CO-4S with no bridging CO

groups show that the amount of  $\pi$ -back-donation for 6CO-4S is larger than that in 7CO-1S, which is in agreement with that the  $\nu(\text{CO})$  vibrational frequencies of 6CO-4S is lower than that in 7CO-1S (Table S23). However, other structures with bridging CO groups or an agostic bond, have no such obvious variation of the CO frequencies. But, the amount of  $d-b$  decreases generally as CO groups are lost, and the CO frequencies decrease with the decreasing of the amount of  $d-b$ .

**Table S23** The  $\nu(\text{CO})$  vibrational frequencies ( $\text{cm}^{-1}$ ) for the  $\text{CpFeMn}(\text{CO})_n$  ( $n = 7, 6, 5$ ) structures by M06-L and BP86 methods (infrared intensities in parentheses are in  $\text{kcal}\cdot\text{mol}^{-1}$ ).

|               | M06-L                                                                          | BP86                                                                          |
|---------------|--------------------------------------------------------------------------------|-------------------------------------------------------------------------------|
| <b>7CO-1S</b> | 2023(33),2035 (179),2043(762)<br>2055(1767),2064 (279),2069(1431)<br>2142(437) | 1948(13),1968(368),1973(793)<br>1980(930),1993(1429),2005(487)<br>2072(478)   |
| <b>7CO-2S</b> | 1893(860),1917(20),2042(650)<br>2061(516),2063(951), 2075 (1204)<br>2142 (649) | 1822 (780),18448(12),1971(631)<br>1988(626),1992(851),2002(934)<br>2068(623)  |
| <b>7CO-3S</b> | 1643(140),2005(714),2027(1110)<br>2050(587),2072(954),2100(1240)<br>2126(307)  | 1571(138),1938(657),1958(1064)<br>1981(515),1996(907),2027(1092)<br>2052(292) |
| <b>7CO-4S</b> | 1637(138),2016(621),2026(1123)<br>2050(547),2069(909),2096(838)<br>2127(611)   | 1565(132),1948(582),1957(1035)<br>1981(503),1992(861),2023(753)<br>2053(553)  |
| <b>6CO-1S</b> | 2022(1),2033(262),2050(573)<br>2052(1914),2058(1358), 2132(463)                | 1953(1),1966(410),1977(1809)<br>1981(398),1989(1233),2060(425)                |
| <b>6CO-2T</b> | 1932(840),1933(863),1960(55)<br>2063(857),2064(840),2123(1136)                 | 1860(743),1861(755),1886(50)<br>1989(778),1990(767),2045(1059)                |
| <b>6CO-3S</b> | 1835(347),2020(573),2037(541)<br>2049(495),2061(1657), 2132(546)               | 1778(308),1954(512),1965(540)<br>1976(575.9),1987(1409),2059(519)             |
| <b>6CO-4S</b> | 1991(446),2006(878),201(98)<br>2039(1150),2053(905),2123(819)                  | 1924(763),1924(366),1946(103)<br>1963(1074),1977(867),2043.5(752)             |
| <b>6CO-5S</b> | 1895(813),1927(106),2038(744)<br>2042(977),2071(1401), 2113 (620)              | 1815(762),1840(49),1962(644)<br>1974(819),1999(1225),2037 (612)               |
| <b>5CO-1S</b> | 1955(697),1967(425),2026(988)<br>2039(969),2101(959)                           | 1884(596),1899(383),1952(909)<br>1964(869),2025 (866)                         |
| <b>5CO-2T</b> | 1908(908),1914(135),2032(944)<br>2054(816),2106 (1277)                         | 1824(762),1835(169),1955(804)<br>1981(779),2027 (1215)                        |
| <b>5CO-3S</b> | 1780(325),1999(604),2018(830)<br>2046(1106),2092(728)                          | 1775(296),1926(643),1941(711)<br>1975 (971),2012 (638)                        |
| <b>5CO-4S</b> | 1800(499),2011(321),2020(652)<br>2029(1461),2091 (780)                         | 1736(462),1941(379),1947(832)<br>1963 (1125),2016(666)                        |

**Table S24** Energies ( $\Delta E$ , in kcal·mol<sup>-1</sup>) for reactions of CpFeMn(CO)<sub>n</sub> using the BP86 method.

|                                                                                                                   | $\Delta E$ |
|-------------------------------------------------------------------------------------------------------------------|------------|
| CpFeMn(CO) <sub>7</sub> ( <b>7CO-1S</b> ) → CpFeMn(CO) <sub>6</sub> ( <b>6CO-1S</b> ) + CO                        | 32.4       |
| CpFeMn(CO) <sub>6</sub> ( <b>6CO-1 S</b> ) → CpFeMn(CO) <sub>5</sub> ( <b>5CO-1S</b> ) + CO                       | 26.1       |
| CpFeMn(CO) <sub>7</sub> → CpFe(CO) <sub>2</sub> · + Mn(CO) <sub>5</sub> ·                                         | 26.1       |
| CpFeMn(CO) <sub>6</sub> → CpFe(CO) <sub>2</sub> · + Mn(CO) <sub>4</sub> ·                                         | 41.0       |
| CpFeMn(CO) <sub>6</sub> → CpFeCO· + Mn(CO) <sub>5</sub> ·                                                         | 53.0       |
| 2CpFeMn(CO) <sub>6</sub> → CpFeMn(CO) <sub>7</sub> + CpFeMn(CO) <sub>5</sub>                                      | -6.3       |
| 2CpFeMn(CO) <sub>7</sub> → Cp <sub>2</sub> Fe <sub>2</sub> (CO) <sub>4</sub> + Mn <sub>2</sub> (CO) <sub>10</sub> | -9.6       |



**Table S25** Energies ( $\Delta E$ , in kcal·mol<sup>-1</sup>) for reactions of CpFeMn(CO)<sub>n</sub> at the M06-L level of theory using the empirical dispersion correction by Grimme's DFT-D3 method.

| Structures                                                                                                        | $\Delta E$ |
|-------------------------------------------------------------------------------------------------------------------|------------|
| CpFeMn(CO) <sub>7</sub> ( <b>7CO-1S</b> ) → CpFeMn(CO) <sub>6</sub> ( <b>6CO-1S</b> ) + CO                        | 33.5       |
| CpFeMn(CO) <sub>6</sub> ( <b>6CO-1S</b> ) → CpFeMn(CO) <sub>5</sub> ( <b>5CO-1S</b> ) + CO                        | 30.7       |
| CpFeMn(CO) <sub>7</sub> → CpFe(CO) <sub>2</sub> · + Mn(CO) <sub>5</sub> ·                                         | 32.2       |
| CpFeMn(CO) <sub>6</sub> → CpFe(CO) <sub>2</sub> · + Mn(CO) <sub>4</sub> ·                                         | 43.5       |
| CpFeMn(CO) <sub>6</sub> → CpFeCO· + Mn(CO) <sub>5</sub> ·                                                         | 53.1       |
| 2CpFeMn(CO) <sub>6</sub> → CpFeMn(CO) <sub>7</sub> + CpFeMn(CO) <sub>5</sub>                                      | -2.8       |
| 2CpFeMn(CO) <sub>7</sub> → Cp <sub>2</sub> Fe <sub>2</sub> (CO) <sub>4</sub> + Mn <sub>2</sub> (CO) <sub>10</sub> | -5.2       |

**Table S26** Energies ( $\Delta E$ , in kcal·mol<sup>-1</sup>) for reactions of CpFeMn(CO)<sub>n</sub> at the BP86 level of theory using the empirical dispersion correction by Grimme's DFT-D3 method.

| Structures                                                                                                        | $\Delta E$ |
|-------------------------------------------------------------------------------------------------------------------|------------|
| CpFeMn(CO) <sub>7</sub> ( <b>7CO-1S</b> ) → CpFeMn(CO) <sub>6</sub> ( <b>6CO-1S</b> ) + CO                        | 37.5       |
| CpFeMn(CO) <sub>6</sub> ( <b>6CO-1S</b> ) → CpFeMn(CO) <sub>5</sub> ( <b>5CO-1S</b> ) + CO                        | 31.5       |
| CpFeMn(CO) <sub>7</sub> → CpFe(CO) <sub>2</sub> · + Mn(CO) <sub>5</sub> ·                                         | 40.6       |
| CpFeMn(CO) <sub>6</sub> → CpFe(CO) <sub>2</sub> · + Mn(CO) <sub>4</sub> ·                                         | 52.6       |
| CpFeMn(CO) <sub>6</sub> → CpFeCO· + Mn(CO) <sub>5</sub> ·                                                         | 64.8       |
| 2CpFeMn(CO) <sub>6</sub> → CpFeMn(CO) <sub>7</sub> + CpFeMn(CO) <sub>5</sub>                                      | -6.1       |
| 2CpFeMn(CO) <sub>7</sub> → Cp <sub>2</sub> Fe <sub>2</sub> (CO) <sub>4</sub> + Mn <sub>2</sub> (CO) <sub>10</sub> | -9.0       |

## The description of the DZP basis set

The double- $\zeta$  plus polarization (DZP) basis sets were used for all computations. For carbon and oxygen, these DZP basis sets were obtained by adding one set of pure spherical harmonic d functions with orbital exponents  $\alpha_d(\text{C}) = 0.75$  and  $\alpha_d(\text{O}) = 0.85$ , respectively, to the Huzinaga–Dunning standard contracted DZ sets, designated as (9s5p1d/4s2p1d)<sup>4,5</sup> For iron and manganese, our loosely contracted DZP basis set (14s11p6d/10s8p3d) uses the Wachters primitive set<sup>6</sup> augmented by two sets of p functions and one set of d functions, and contracted following Hood, Pitzer, and Schaefer.<sup>7</sup> For hydrogen, a set of p polarization functions ( $\alpha_p(\text{H}) = 0.75$ ) was added to the Huzinaga–Dunning DZ sets.

### Complete Gaussian Reference

M. J. Frisch, G. W. Trucks, H. B. Schlegel, G. E. Scuseria, M. A. Robb, J. R. Cheeseman, G. Scalmani, V. Barone, B. Mennucci, G. A. Petersson, H. Nakatsuji, M. Caricato, X. Li, H. P. Hratchian, A. F. Izmaylov, J. Bloino, G. Zheng, J. L. Sonnenberg, M. Hada, M. Ehara, K. Toyota, R. Fukuda, J. Hasegawa, M. Ishida, T. Nakajima, Y. Honda, O. Kitao, H. Nakai, T. Vreven, J. A. Montgomery, Jr., J. E. Peralta, F. Ogliaro, M. Bearpark, J. J. Heyd, E. Brothers, K. N. Kudin, V. N. Staroverov, R. Kobayashi, J. Normand, K. Raghavachari, A. Rendell, J. C. Burant, S. S. Iyengar, J. Tomasi, M. Cossi, N. Rega, J. M. Millam, M. Klene, J. E. Knox, J. B. Cross, V. Bakken, C. Adamo, J. Jaramillo, R. Gomperts, R. E. Stratmann, O. Yazyev, A. J. Austin, R. Cammi, C. Pomelli, J. W. Ochterski, R. L. Martin, K. Morokuma, V. G. Zakrzewski, G. A. Voth, P. Salvador, J. J. Dannenberg, S. Dapprich, A. D. Daniels, O. Farkas, J. B. Foresman, J. V. Ortiz, J. Cioslowski, and D. J. Fox, Gaussian 09, Revision D.01, Gaussian, Inc., Wallingford CT, 2013.

## Literature References

- (1) S. I. Gorelsky, S. Ghosh and E. I. Solomon, *J. Am. Chem. Soc.*, 2006, **128**, 278.
- (2) J. Rusanova, E. Rusanov, S. I. Gorelsky, D. Christendat and R. Popescu, *Inorg. Chem.*, 2006, **45**, 6246
- (3) W. Petz, F. Weller, J. Uddin and G. Frenking, *Organometallics*, 1999, **18**, 619.
- (4) S. Huzinaga, *J. Chem. Phys.*, 1965, **42**, 1293.
- (5) T. H. Dunning, *J. Chem. Phys.* 1970, **53**, 2823.
- (6) A. J. H. Wachters, *J. Chem. Phys.* 1970, **52**, 1033.
- (7) D. M. Hood, R. M. Pitzer and H. F. Schaefer, *J. Chem. Phys.* 1979, **71**, 705.
